# Supplementary material for: Income Differences in Smoking Prevalences in 245 Districts of South Korea: Patterns by Area Deprivation and Urbanity, 2008-2014
Source: PubMed Central journal article supplement — J Prev Med Public Health. 2017 Feb 9;50(2):100–26. doi: 10.3961/jpmph.16.069 (PMC5398336; doi:10.3961/jpmph.16.069), 2017-02-09
Supplement: jpmph-50-2-100-suppl1.pdf [file jpmph-50-2-100-suppl1.pdf]

**Supplemental Table 1.** Ten top and bottom districts in terms of smoking prevalences in South Korea

|       | Top 10            |                |                         | Bottom 10         |               |                         |
|-------|-------------------|----------------|-------------------------|-------------------|---------------|-------------------------|
|       | Province          | District       | Smoking prevalences (%) | Province          | District      | Smoking prevalences (%) |
| Men   | Gangwon-do        | Taebaek-si     | 56.1                    | Gyeonggi-do       | Gwacheon-si   | 31.4                    |
|       | Gyeonggi-do       | Pocheon-si     | 52.7                    | Gyeonggi-do       | Bundang-gu    | 33.0                    |
|       | Gangwon-do        | Jeongseon-gun  | 52.3                    | Seoul             | Seocho-gu     | 34.4                    |
|       | Chungcheongbuk-do | Eumseong-gun   | 52.3                    | Seoul             | Gangnam-gu    | 34.5                    |
|       | Gyeongsangbuk-do  | Seongju-gun    | 52.2                    | Gyeonggi-do       | Suji-gu       | 35.8                    |
|       | Daegu             | Seo-gu         | 52.0                    | Gyeonggi-do       | Yeongtong-gu  | 38.2                    |
|       | Busan             | Jung-gu        | 51.8                    | Gyeonggi-do       | Dongan-gu     | 38.2                    |
|       | Busan             | Dong-gu        | 51.6                    | Chungcheongnam-do | Gyeryong-si   | 38.4                    |
|       | Gyeonggi-do       | Ojeong-gu      | 51.5                    | Seoul             | Songpa-gu     | 38.5                    |
|       | Gyeongsangbuk-do  | Gunwi-gun      | 51.4                    | Gyeonggi-do       | Giheung-gu    | 38.6                    |
| Women | Gyeonggi-do       | Dongducheon-si | 7.4                     | Jeollanam-do      | Goheung-gun   | 0.8                     |
|       | Incheon           | Jung-gu        | 5.9                     | Jeollanam-do      | Muan-gun      | 0.8                     |
|       | Gyeonggi-do       | Ojeong-gu      | 5.7                     | Jeollanam-do      | Boseong-gun   | 1.0                     |
|       | Gyeonggi-do       | Jungwon-gu     | 5.6                     | Jeollanam-do      | Sinan-gun     | 1.0                     |
|       | Gyeonggi-do       | Pocheon-si     | 5.5                     | Jeollanam-do      | Jangheung-gun | 1.0                     |
|       | Busan             | Jung-gu        | 5.2                     | Jeollabuk-do      | Imsil-gun     | 1.1                     |
|       | Incheon           | Nam-gu         | 5.2                     | Jeollanam-do      | Gangjin-gun   | 1.1                     |
|       | Gyeonggi-do       | Pyeongtaek-si  | 5.2                     | Jeollanam-do      | Gurye-gun     | 1.1                     |
|       | Gyeonggi-do       | Osan-si        | 5.1                     | Gyeonggi-do       | Bundang-gu    | 1.2                     |
|       | Incheon           | Namdong-gu     | 5.0                     | Jeollanam-do      | Wando-gun     | 1.2                     |

Source from the Community Health Survey in South Korea, 2008-2014.
