# Supplementary material for: Income Differences in Smoking Prevalences in 245 Districts of South Korea: Patterns by Area Deprivation and Urbanity, 2008-2014
Source: PubMed Central journal article supplement — J Prev Med Public Health. 2017 Feb 9;50(2):100–26. doi: 10.3961/jpmph.16.069 (PMC5398336; doi:10.3961/jpmph.16.069), 2017-02-09
Supplement: jpmph-50-2-100-suppl2.pdf [file jpmph-50-2-100-suppl2.pdf]

**Supplemental Table 2.** Ten top and bottom districts in terms of interquintile differences in smoking prevalence between the lowest and highest income quintiles in South Korea

|       | Top 10           |                |                                                      | Bottom 10         |                 |                                                      |
|-------|------------------|----------------|------------------------------------------------------|-------------------|-----------------|------------------------------------------------------|
|       | Province         | District       | Interquintile differences in smoking prevalence (%p) | Province          | District        | Interquintile differences in smoking prevalence (%p) |
| Men   | Gyeongsangbuk-do | Uljin-gun      | 20.2                                                 | Gyeonggi-do       | Uijeongbu-si    | -3.7                                                 |
|       | Gyeonggi-do      | Anseong-si     | 18.0                                                 | Gangwon-do        | Inje-gun        | -2.9                                                 |
|       | Seoul            | Mapo-gu        | 17.0                                                 | Jeollanam-do      | Jindo-gun       | -2.5                                                 |
|       | Jeollabuk-do     | Gochang-gun    | 16.4                                                 | Incheon           | Ongjin-gun      | -2.2                                                 |
|       | Seoul            | Gwangjin-gu    | 15.2                                                 | Jeollanam-do      | Goheung-gun     | -1.6                                                 |
|       | Busan            | Nam-gu         | 15.1                                                 | Chungcheongbuk-do | Goesan-gun      | -0.7                                                 |
|       | Seoul            | Yongsan-gu     | 14.8                                                 | Chungcheongnam-do | Dangjin-si      | -0.4                                                 |
|       | Gyeongsangnam-do | Uiryeong-gun   | 14.7                                                 | Gyeonggi-do       | Ilsandong-gu    | -0.3                                                 |
|       | Gyeongsangnam-do | Masan-si       | 14.6                                                 | Chungcheongbuk-do | Jeungpyeong-gun | -0.3                                                 |
|       | Busan            | Haeundae-gu    | 14.3                                                 | Jeollanam-do      | Boseong-gun     | 0.4                                                  |
| Women | Gyeonggi-do      | Dongducheon-si | 9.5                                                  | Incheon           | Ongjin-gun      | -1.4                                                 |
|       | Gyeonggi-do      | Sangnok-gu     | 6.7                                                  | Gyeongsangbuk-do  | Uljin-gun       | -1.0                                                 |
|       | Gyeongsangnam-do | Tongyeong-si   | 6.7                                                  | Gyeongsangbuk-do  | Ulleung-gun     | -0.9                                                 |
|       | Gangwon-do       | Wonju-si       | 6.6                                                  | Jeollanam-do      | Gurye-gun       | -0.5                                                 |
|       | Busan            | Jung-gu        | 6.5                                                  | Jeollanam-do      | Sinan-gun       | -0.3                                                 |
|       | Gyeonggi-do      | Guri-si        | 6.3                                                  | Busan             | Gijang-gun      | 0.0                                                  |
|       | Gyeonggi-do      | Paju-si        | 6.2                                                  | Gyeonggi-do       | Bundang-gu      | 0.1                                                  |
|       | Ulsan            | Nam-gu         | 6.2                                                  | Jeollanam-do      | Goheung-gun     | 0.2                                                  |
|       | Busan            | Haeundae-gu    | 6.1                                                  | Jeollanam-do      | Muan-gun        | 0.4                                                  |
|       | Gyeonggi-do      | Yeoncheon-gun  | 5.9                                                  | Gangwon-do        | Hwacheon-gun    | 0.5                                                  |

Source from the Community Health Survey in South Korea, 2008-2014.
