# Supplementary material for: Income Differences in Smoking Prevalences in 245 Districts of South Korea: Patterns by Area Deprivation and Urbanity, 2008-2014
Source: PubMed Central journal article supplement — J Prev Med Public Health. 2017 Feb 9;50(2):100–26. doi: 10.3961/jpmph.16.069 (PMC5398336; doi:10.3961/jpmph.16.069), 2017-02-09
Supplement: jpmph-50-2-100-suppl3.pdf [file jpmph-50-2-100-suppl3.pdf]

**Supplemental Table 3.** Smoking prevalences, smoking prevalences according to income quintiles, and interquintile differences in smoking prevalence (between the highest [Q5] and the lowest [Q1] income quintiles) in 245 local districts of South Korea.

| Gender | Provinces | Districts       | Overall           | Q1 (lowest)       | Q2                | Q3                | Q4                | Q5 (highest)      | Q1-Q5             | Urbanity     |
|--------|-----------|-----------------|-------------------|-------------------|-------------------|-------------------|-------------------|-------------------|-------------------|--------------|
| Men    | Seoul     | Jongno-gu       | 42.5 (40.1, 44.8) | 44.7 (39.1, 50.2) | 48.4 (42.8, 54.1) | 44.8 (39.3, 50.4) | 39.2 (34.2, 44.2) | 35.6 (30.8, 40.4) | 9.1 (3.5, 14.7)   | Metropolitan |
| Men    | Seoul     | Jung-gu         | 45.1 (42.7, 47.5) | 48.7 (43.0, 54.3) | 46.2 (40.7, 51.7) | 46.7 (41.2, 52.1) | 42.7 (37.4, 47.9) | 41.1 (36.0, 46.3) | 7.6 (1.9, 13.3)   | Metropolitan |
| Men    | Seoul     | Yongsan-gu      | 43.0 (40.6, 45.5) | 50.3 (44.4, 56.3) | 45.3 (39.9, 50.7) | 45.3 (39.7, 51.0) | 38.2 (33.0, 43.3) | 35.5 (30.5, 40.5) | 14.8 (9.0, 20.6)  | Metropolitan |
| Men    | Seoul     | Seongdong-gu    | 43.0 (40.6, 45.4) | 50.3 (44.5, 56.0) | 43.7 (38.4, 48.9) | 40.8 (35.5, 46.0) | 41.6 (36.4, 46.7) | 38.8 (33.6, 44.0) | 11.5 (5.7, 17.3)  | Metropolitan |
| Men    | Seoul     | Gwangjin-gu     | 42.1 (39.8, 44.5) | 49.5 (43.7, 55.4) | 46.0 (40.6, 51.5) | 41.7 (36.4, 47.0) | 39.1 (34.2, 44.0) | 34.3 (29.6, 39.1) | 15.2 (9.5, 20.9)  | Metropolitan |
| Men    | Seoul     | Dongdaemun-gu   | 44.8 (42.4, 47.3) | 49.8 (43.9, 55.6) | 46.9 (41.3, 52.5) | 44.1 (38.7, 49.5) | 41.7 (36.4, 47.0) | 41.6 (36.2, 47.0) | 8.2 (2.4, 14.0)   | Metropolitan |
| Men    | Seoul     | Jungnang-gu     | 43.0 (40.6, 45.5) | 47.7 (41.9, 53.5) | 45.1 (39.6, 50.6) | 39.3 (34.1, 44.4) | 41.7 (36.5, 47.0) | 41.7 (36.3, 47.1) | 6.0 (0.1, 11.9)   | Metropolitan |
| Men    | Seoul     | Seongbuk-gu     | 46.0 (43.5, 48.4) | 50.9 (45.0, 56.8) | 50.7 (45.0, 56.5) | 48.6 (43.1, 54.1) | 41.2 (35.9, 46.4) | 38.0 (33.0, 43.0) | 12.9 (7.2, 18.6)  | Metropolitan |
| Men    | Seoul     | Gangbuk-gu      | 46.6 (44.1, 49.1) | 51.8 (45.8, 57.9) | 45.7 (40.2, 51.2) | 49.2 (43.6, 54.9) | 43.0 (37.5, 48.4) | 43.4 (37.9, 48.8) | 8.4 (2.6, 14.2)   | Metropolitan |
| Men    | Seoul     | Dobong-gu       | 44.3 (41.9, 46.7) | 47.3 (41.6, 53.0) | 47.0 (41.5, 52.5) | 44.3 (38.9, 49.7) | 41.2 (36.0, 46.3) | 42.0 (36.6, 47.4) | 5.3 (-0.5, 11.1)  | Metropolitan |
| Men    | Seoul     | Nowon-gu        | 40.9 (38.5, 43.2) | 42.9 (37.3, 48.4) | 41.8 (36.5, 47.1) | 40.9 (35.7, 46.1) | 40.4 (35.2, 45.7) | 38.1 (32.9, 43.3) | 4.8 (-1.1, 10.7)  | Metropolitan |
| Men    | Seoul     | Eunpyeong-gu    | 43.3 (40.9, 45.7) | 45.0 (39.3, 50.6) | 46.3 (40.8, 51.7) | 42.1 (36.9, 47.3) | 40.8 (35.5, 46.1) | 41.8 (36.4, 47.1) | 3.2 (-2.7, 9.1)   | Metropolitan |
| Men    | Seoul     | Seodaemun-gu    | 42.9 (40.5, 45.4) | 47.6 (41.8, 53.3) | 42.5 (37.2, 47.8) | 45.4 (39.9, 50.8) | 38.8 (33.7, 43.9) | 40.6 (35.2, 45.9) | 7.0 (1.1, 12.9)   | Metropolitan |
| Men    | Seoul     | Mapo-gu         | 42.3 (39.9, 44.8) | 53.0 (46.8, 59.3) | 40.9 (35.7, 46.2) | 41.8 (36.4, 47.3) | 40.8 (35.4, 46.1) | 36.0 (31.1, 41.0) | 17.0 (11.2, 22.8) | Metropolitan |
| Men    | Seoul     | Yangcheon-gu    | 40.3 (37.9, 42.7) | 46.9 (40.9, 52.8) | 40.8 (35.6, 46.1) | 39.7 (34.4, 45.0) | 38.9 (33.8, 44.0) | 35.1 (29.9, 40.2) | 11.8 (5.8, 17.8)  | Metropolitan |
| Men    | Seoul     | Gangseo-gu      | 41.6 (39.3, 44.0) | 43.9 (38.4, 49.4) | 44.4 (39.1, 49.7) | 45.3 (40.0, 50.7) | 36.1 (31.3, 40.9) | 38.4 (33.3, 43.4) | 5.5 (-0.2, 11.2)  | Metropolitan |
| Men    | Seoul     | Guro-gu         | 42.6 (40.2, 45.0) | 49.1 (43.3, 54.9) | 39.5 (34.5, 44.6) | 42.8 (37.5, 48.1) | 44.2 (38.9, 49.6) | 37.5 (32.4, 42.6) | 11.6 (5.8, 17.4)  | Metropolitan |
| Men    | Seoul     | Geumcheon-gu    | 45.4 (43.0, 47.8) | 47.8 (42.3, 53.4) | 49.7 (44.3, 55.2) | 43.9 (38.6, 49.1) | 45.3 (40.1, 50.5) | 40.2 (35.1, 45.2) | 7.6 (2.0, 13.2)   | Metropolitan |
| Men    | Seoul     | Yeongdeungpo-gu | 39.4 (37.1, 41.7) | 45.4 (39.9, 50.8) | 41.5 (36.4, 46.6) | 38.9 (33.8, 44.1) | 34.1 (29.3, 38.8) | 36.8 (31.7, 41.8) | 8.6 (2.9, 14.3)   | Metropolitan |
| Men    | Seoul     | Dongjak-gu      | 39.7 (37.4, 42.0) | 45.7 (40.1, 51.3) | 39.8 (34.7, 44.8) | 40.5 (35.3, 45.8) | 38.0 (33.1, 43.0) | 34.9 (30.1, 39.8) | 10.8 (5.1, 16.5)  | Metropolitan |
| Men    | Seoul     | Gwanak-gu       | 41.9 (39.5, 44.3) | 47.9 (42.1, 53.8) | 41.6 (36.3, 46.9) | 40.2 (35.2, 45.2) | 42.0 (36.7, 47.3) | 38.0 (32.9, 43.1) | 9.9 (4.2, 15.6)   | Metropolitan |
| Men    | Seoul     | Seocho-gu       | 34.4 (32.2, 36.5) | 38.5 (33.3, 43.8) | 37.1 (32.1, 42.1) | 35.0 (30.2, 39.8) | 30.9 (26.4, 35.4) | 29.7 (25.1, 34.4) | 8.8 (3.1, 14.5)   | Metropolitan |
| Men    | Seoul     | Gangnam-gu      | 34.5 (32.4, 36.7) | 37.4 (32.2, 42.6) | 36.9 (32.1, 41.7) | 32.2 (27.5, 36.9) | 33.0 (28.4, 37.6) | 32.7 (28.0, 37.4) | 4.7 (-1.0, 10.4)  | Metropolitan |
| Men    | Seoul     | Songpa-gu       | 38.5 (36.3, 40.8) | 42.8 (37.3, 48.3) | 42.6 (37.3, 47.9) | 39.9 (34.8, 45.0) | 36.4 (31.5, 41.3) | 31.3 (26.8, 35.7) | 11.5 (6.0, 17.0)  | Metropolitan |
| Men    | Seoul     | Gangdong-gu     | 40.9 (38.5, 43.2) | 42.9 (37.5, 48.3) | 43.8 (38.4, 49.1) | 41.3 (35.9, 46.7) | 42.3 (37.0, 47.5) | 33.7 (29.0, 38.5) | 9.2 (3.6, 14.8)   | Metropolitan |
| Men    | Busan     | Jung-gu         | 51.8 (49.0, 54.6) | 55.5 (48.9, 62.0) | 52.0 (45.8, 58.1) | 50.7 (44.7, 56.7) | 48.6 (42.7, 54.5) | 52.2 (45.9, 58.5) | 3.3 (-2.7, 9.3)   | Metropolitan |
| Men    | Busan     | Seo-gu          | 50.2 (47.5, 52.8) | 55.3 (49.1, 61.5) | 55.2 (49.2, 61.2) | 52.2 (46.1, 58.3) | 45.0 (39.5, 50.6) | 42.9 (37.4, 48.5) | 12.4 (6.6, 18.2)  | Metropolitan |
| Men    | Busan     | Dong-gu         | 51.6 (48.8, 54.3) | 53.7 (47.3, 60.0) | 52.8 (46.7, 58.9) | 51.7 (45.6, 57.9) | 50.6 (44.5, 56.6) | 48.6 (42.5, 54.7) | 5.1 (-0.9, 11.1)  | Metropolitan |
| Men    | Busan     | Yeongdo-gu      | 50.8 (48.2, 53.5) | 53.1 (46.9, 59.4) | 53.5 (47.5, 59.4) | 45.9 (40.3, 51.6) | 49.3 (43.5, 55.0) | 52.4 (46.4, 58.5) | 0.7 (-5.2, 6.6)   | Metropolitan |
| Men    | Busan     | Busanjin-gu     | 48.0 (45.5, 50.6) | 53.0 (46.9, 59.0) | 51.3 (45.5, 57.0) | 48.0 (42.3, 53.8) | 45.5 (40.0, 51.0) | 42.3 (36.9, 47.7) | 10.7 (4.9, 16.5)  | Metropolitan |
| Men    | Busan     | Dongnae-gu      | 43.1 (40.7, 45.5) | 47.9 (42.4, 53.4) | 46.8 (41.2, 52.5) | 43.5 (38.2, 48.9) | 39.4 (34.3, 44.4) | 36.9 (31.7, 42.1) | 11.0 (5.4, 16.6)  | Metropolitan |
| Men    | Busan     | Nam-gu          | 46.1 (43.6, 48.6) | 52.5 (46.5, 58.5) | 48.6 (42.9, 54.3) | 43.8 (38.4, 49.2) | 47.8 (42.2, 53.5) | 37.4 (32.2, 42.6) | 15.1 (9.3, 20.9)  | Metropolitan |
| Men    | Busan     | Buk-gu          | 45.2 (42.8, 47.7) | 48.8 (43.0, 54.6) | 46.9 (41.2, 52.6) | 44.8 (39.3, 50.3) | 46.3 (40.8, 51.7) | 39.4 (34.1, 44.7) | 9.4 (3.7, 15.1)   | Metropolitan |
| Men    | Busan     | Haeundae-gu     | 44.1 (41.7, 46.6) | 52.9 (46.8, 59.1) | 45.4 (40.0, 50.9) | 44.1 (38.6, 49.6) | 40.2 (35.0, 45.4) | 38.6 (33.4, 43.7) | 14.3 (8.4, 20.2)  | Metropolitan |
| Men    | Busan     | Saha-gu         | 46.5 (44.0, 49.0) | 53.3 (47.2, 59.5) | 47.7 (42.2, 53.3) | 48.7 (42.9, 54.4) | 40.8 (35.6, 46.0) | 41.9 (36.6, 47.2) | 11.4 (5.6, 17.2)  | Metropolitan |
| Men    | Busan     | Geumjeong-gu    | 45.9 (43.4, 48.5) | 53.9 (47.6, 60.2) | 45.9 (40.1, 51.7) | 47.2 (41.7, 52.7) | 43.0 (37.7, 48.4) | 40.7 (35.5, 45.9) | 13.2 (7.5, 18.9)  | Metropolitan |
| Men    | Busan     | Gangseo-gu      | 49.5 (46.9, 52.1) | 52.8 (46.9, 58.7) | 52.4 (46.6, 58.1) | 52.3 (46.3, 58.2) | 48.5 (42.8, 54.2) | 41.4 (36.1, 46.8) | 11.4 (5.7, 17.1)  | Metropolitan |
| Men    | Busan     | Yeonje-gu       | 42.1 (39.7, 44.6) | 46.0 (40.2, 51.7) | 46.5 (40.8, 52.1) | 41.2 (35.8, 46.6) | 41.6 (36.3, 46.8) | 35.3 (30.3, 40.4) | 10.7 (4.9, 16.5)  | Metropolitan |
| Men    | Busan     | Suyeong-gu      | 44.5 (42.0, 47.0) | 47.0 (41.3, 52.8) | 43.8 (38.4, 49.3) | 45.4 (39.9, 50.9) | 41.8 (36.5, 47.2) | 44.5 (38.8, 50.2) | 2.5 (-3.3, 8.3)   | Metropolitan |
| Men    | Busan     | Sasang-gu       | 48.3 (45.8, 50.8) | 49.3 (43.6, 55.0) | 50.9 (45.2, 56.6) | 47.7 (42.1, 53.2) | 47.2 (41.8, 52.7) | 46.9 (41.5, 52.4) | 2.4 (-3.2, 8.0)   | Metropolitan |
| Men    | Busan     | Gijang-gun      | 49.4 (46.9, 52.0) | 51.6 (45.7, 57.5) | 49.9 (44.1, 55.8) | 51.8 (46.1, 57.6) | 48.8 (43.0, 54.5) | 44.9 (39.3, 50.4) | 6.7 (0.8, 12.6)   | Rural        |
| Men    | Daegu     | Jung-gu         | 47.2 (44.6, 49.8) | 52.4 (46.2, 58.7) | 52.7 (46.8, 58.6) | 47.6 (41.7, 53.4) | 43.2 (37.7, 48.6) | 39.9 (34.4, 45.4) | 12.5 (6.5, 18.5)  | Metropolitan |
| Men    | Daegu     | Dong-gu         | 47.1 (44.6, 49.6) | 48.6 (42.7, 54.5) | 51.2 (45.5, 56.9) | 45.4 (40.0, 50.9) | 48.9 (43.2, 54.6) | 41.3 (36.1, 46.6) | 7.3 (1.5, 13.1)   | Metropolitan |
| Men    | Daegu     | Seo-gu          | 52.0 (49.4, 54.7) | 53.1 (47.1, 59.1) | 52.1 (46.0, 58.2) | 51.7 (45.9, 57.4) | 53.4 (47.4, 59.5) | 50.0 (44.2, 55.8) | 3.1 (-2.7, 8.9)   | Metropolitan |
| Men    | Daegu     | Nam-gu          | 47.7 (45.1, 50.3) | 49.6 (43.7, 55.6) | 49.7 (43.7, 55.6) | 48.2 (42.6, 53.8) | 46.3 (40.5, 52.1) | 44.5 (39.0, 50.0) | 5.1 (-0.7, 10.9)  | Metropolitan |
| Men    | Daegu     | Buk-gu          | 46.4 (44.0, 48.9) | 52.0 (46.1, 57.9) | 50.2 (44.4, 55.9) | 43.6 (38.3, 48.8) | 46.9 (41.5, 52.4) | 40.0 (34.8, 45.1) | 12 (6.3, 17.7)    | Metropolitan |
| Men    | Daegu     | Suseong-gu      | 40.8 (38.5, 43.2) | 46.5 (40.8, 52.2) | 42.0 (36.6, 47.4) | 39.8 (34.7, 44.9) | 41.8 (36.5, 47.1) | 34.0 (29.1, 38.8) | 12.5 (6.9, 18.1)  | Metropolitan |
| Men    | Daegu     | Dalseo-gu       | 46.3 (43.8, 48.8) | 51.5 (45.7, 57.4) | 51.5 (45.7, 57.2) | 45.7 (40.2, 51.1) | 42.1 (36.8, 47.4) | 40.3 (35.1, 45.5) | 11.2 (5.5, 16.9)  | Metropolitan |
| Men    | Daegu     | Dalseong-gun    | 47.5 (45.1, 50.0) | 51.0 (45.2, 56.7) | 48.0 (42.5, 53.5) | 46.2 (40.8, 51.6) | 48.4 (42.8, 53.9) | 44.0 (38.6, 49.4) | 7.0 (1.3, 12.7)   | Rural        |
| Men    | Incheon   | Jung-gu         | 49.3 (46.7, 51.8) | 51.7 (45.7, 57.7) | 51.0 (45.2, 56.8) | 50.3 (44.6, 56.1) | 46.3 (40.8, 51.8) | 47.2 (41.5, 53.0) | 4.5 (-1.4, 10.4)  | Metropolitan |
| Men    | Incheon   | Dong-gu         | 48.8 (46.2, 51.4) | 53.0 (46.9, 59.2) | 49.7 (43.8, 55.6) | 47.4 (41.8, 52.9) | 48.2 (42.4, 53.9) | 46.6 (41.0, 52.2) | 6.4 (0.5, 12.3)   | Metropolitan |
| Men    | Incheon   | Nam-gu          | 49.0 (46.4, 51.5) | 51.9 (45.8, 58.0) | 50.3 (44.5, 56.1) | 48.1 (42.6, 53.7) | 48.5 (42.9, 54.2) | 46.4 (40.8, 52.0) | 5.5 (-0.4, 11.4)  | Metropolitan |

(Continued to the next page)

Supplemental Table 3. Continued from the previous page

| Gender | Provinces   | Districts      | Overall           | Q1 (lowest)       | Q2                | Q3                | Q4                | Q5 (highest)      | Q1-Q5            | Urbanity     |
|--------|-------------|----------------|-------------------|-------------------|-------------------|-------------------|-------------------|-------------------|------------------|--------------|
| Men    | Incheon     | Yeonsu-gu      | 42.5 (40.0, 44.9) | 50.3 (44.0, 56.5) | 40.6 (35.3, 46.0) | 42.7 (37.4, 48.0) | 41.7 (36.2, 47.1) | 37.5 (32.3, 42.7) | 12.8 (6.9, 18.7) | Metropolitan |
| Men    | Incheon     | Namdong-gu     | 44.9 (42.4, 47.5) | 50.6 (44.3, 56.8) | 45.3 (39.6, 51.1) | 43.5 (38.1, 49.0) | 45.3 (39.5, 51.1) | 39.8 (34.3, 45.2) | 10.8 (4.8, 16.8) | Metropolitan |
| Men    | Incheon     | Bupyeong-gu    | 45.4 (43.0, 47.9) | 46.5 (40.7, 52.3) | 48.0 (42.4, 53.6) | 44.4 (38.9, 49.9) | 42.2 (36.9, 47.6) | 46.0 (40.5, 51.5) | 0.5 (-5.3, 6.3)  | Metropolitan |
| Men    | Incheon     | Gyeyang-gu     | 46.1 (43.5, 48.6) | 51.0 (44.9, 57.1) | 44.0 (38.4, 49.6) | 45.5 (40.0, 51.1) | 46.2 (40.6, 51.7) | 44.8 (39.0, 50.5) | 6.2 (0.2, 12.2)  | Metropolitan |
| Men    | Incheon     | Seo-gu         | 47.1 (44.6, 49.6) | 52.1 (46.1, 58.1) | 46.8 (41.4, 52.2) | 45.0 (39.8, 50.2) | 47.6 (41.9, 53.2) | 44.0 (38.5, 49.6) | 8.1 (2.3, 13.9)  | Metropolitan |
| Men    | Incheon     | Ganghwa-gun    | 46.9 (44.1, 49.6) | 50.3 (43.7, 56.9) | 50.2 (44.0, 56.5) | 45.4 (39.5, 51.2) | 42.9 (37.1, 48.7) | 45.9 (39.6, 52.2) | 4.4 (-1.5, 10.3) | Rural        |
| Men    | Incheon     | Ongjin-gun     | 47.6 (45.0, 50.3) | 45.5 (39.6, 51.3) | 50.1 (44.0, 56.3) | 47.8 (42.0, 53.6) | 47.0 (41.1, 52.9) | 47.7 (41.6, 53.7) | -2.2 (-8.2, 3.8) | Rural        |
| Men    | Gwangju     | Dong-gu        | 45.1 (42.6, 47.6) | 47.9 (42.1, 53.8) | 47.3 (41.6, 53.0) | 44.6 (39.1, 50.2) | 46.1 (40.4, 51.8) | 39.6 (34.3, 44.9) | 8.3 (2.5, 14.1)  | Metropolitan |
| Men    | Gwangju     | Seo-gu         | 39.7 (37.5, 42.0) | 43.6 (38.2, 49.0) | 41.1 (35.9, 46.3) | 40.2 (35.2, 45.2) | 37.9 (33.1, 42.8) | 36.2 (31.3, 41.0) | 7.4 (1.8, 13.0)  | Metropolitan |
| Men    | Gwangju     | Nam-gu         | 42.4 (40.0, 44.7) | 48.0 (42.4, 53.7) | 44.0 (38.6, 49.3) | 40.6 (35.5, 45.7) | 40.3 (35.2, 45.3) | 39.3 (34.3, 44.3) | 8.7 (3.1, 14.3)  | Metropolitan |
| Men    | Gwangju     | Buk-gu         | 40.6 (38.3, 42.9) | 43.2 (37.8, 48.6) | 43.5 (38.3, 48.8) | 42.0 (36.9, 47.1) | 37.8 (32.8, 42.8) | 36.2 (31.4, 41.1) | 7.0 (1.3, 12.7)  | Metropolitan |
| Men    | Gwangju     | Gwangsan-gu    | 43.7 (41.3, 46.0) | 48.6 (42.8, 54.4) | 44.1 (38.9, 49.2) | 43.5 (38.2, 48.8) | 44.0 (38.8, 49.1) | 38.5 (33.6, 43.5) | 10.1 (4.5, 15.7) | Metropolitan |
| Men    | Daejeon     | Dong-gu        | 45.9 (43.4, 48.3) | 51.5 (45.6, 57.4) | 48.3 (42.8, 53.8) | 44.0 (38.5, 49.5) | 45.1 (39.7, 50.6) | 40.3 (35.1, 45.5) | 11.2 (5.4, 17.0) | Metropolitan |
| Men    | Daejeon     | Jung-gu        | 46.1 (43.6, 48.6) | 51.0 (45.0, 56.9) | 49.5 (43.7, 55.3) | 44.9 (39.4, 50.4) | 45.8 (40.2, 51.3) | 38.9 (33.7, 44.1) | 12.1 (6.3, 17.9) | Metropolitan |
| Men    | Daejeon     | Seo-gu         | 42.1 (39.8, 44.5) | 47.0 (41.2, 52.8) | 41.9 (36.8, 46.9) | 40.5 (35.3, 45.7) | 43.5 (38.2, 48.7) | 38.7 (33.6, 43.7) | 8.3 (2.6, 14.0)  | Metropolitan |
| Men    | Daejeon     | Yuseong-gu     | 39.2 (36.9, 41.5) | 45.5 (40.1, 50.9) | 43.7 (38.4, 49.0) | 39.6 (34.5, 44.7) | 34.2 (29.3, 39.1) | 31.5 (26.6, 36.3) | 14.0 (8.5, 19.5) | Metropolitan |
| Men    | Daejeon     | Daedeok-gu     | 44.7 (42.3, 47.1) | 44.7 (39.1, 50.2) | 47.2 (41.6, 52.7) | 43.5 (38.3, 48.8) | 46.7 (41.2, 52.1) | 41.0 (35.7, 46.3) | 3.7 (-2.1, 9.5)  | Metropolitan |
| Men    | Ulsan       | Jung-gu        | 47.1 (44.6, 49.6) | 51.8 (46.0, 57.7) | 46.5 (41.1, 51.9) | 47.0 (41.4, 52.6) | 44.7 (39.3, 50.1) | 45.8 (40.3, 51.4) | 6.0 (0.3, 11.7)  | Metropolitan |
| Men    | Ulsan       | Nam-gu         | 45.5 (43.0, 48.0) | 49.3 (43.3, 55.4) | 46.4 (40.9, 51.9) | 46.7 (41.2, 52.2) | 44.3 (38.8, 49.7) | 41.3 (36.0, 46.5) | 8.0 (2.3, 13.7)  | Metropolitan |
| Men    | Ulsan       | Dong-gu        | 48.2 (45.7, 50.7) | 56.4 (50.1, 62.8) | 49.7 (44.1, 55.4) | 46.4 (41.0, 51.8) | 43.1 (38.0, 48.2) | 46.8 (40.8, 52.9) | 9.6 (4.0, 15.2)  | Metropolitan |
| Men    | Ulsan       | Buk-gu         | 42.9 (40.5, 45.3) | 47.6 (41.8, 53.3) | 46.6 (40.9, 52.4) | 41.4 (36.3, 46.4) | 39.0 (33.9, 44.2) | 40.3 (35.0, 45.6) | 7.3 (1.7, 12.9)  | Metropolitan |
| Men    | Ulsan       | Ulju-gun       | 45.4 (43.0, 47.8) | 48.3 (42.6, 54.0) | 49.0 (43.5, 54.6) | 40.2 (35.1, 45.3) | 43.7 (38.4, 48.9) | 45.6 (40.0, 51.2) | 2.7 (-3.1, 8.5)  | Rural        |
| Men    | Sejong      | Sejong         | 44.1 (40.4, 47.8) | 45.9 (37.2, 54.6) | 46.0 (37.7, 54.2) | 44.9 (36.7, 53.2) | 42.3 (34.3, 50.2) | 41.7 (33.2, 50.1) | 4.2 (-4.8, 13.2) | Metropolitan |
| Men    | Gyeonggi-do | Jangan-gu      | 43.2 (40.8, 45.6) | 48.8 (42.9, 54.7) | 43.1 (37.9, 48.3) | 44.3 (38.9, 49.7) | 42.0 (36.6, 47.4) | 37.9 (32.9, 42.9) | 10.9 (5.2, 16.6) | Metropolitan |
| Men    | Gyeonggi-do | Gwanseon-gu    | 46.1 (43.7, 48.6) | 52.1 (46.3, 58.0) | 48.1 (42.7, 53.5) | 44.5 (39.1, 49.9) | 44.2 (38.9, 49.6) | 41.1 (35.6, 46.5) | 11.0 (5.2, 16.8) | Metropolitan |
| Men    | Gyeonggi-do | Paldal-gu      | 45.9 (43.5, 48.4) | 48.4 (42.7, 54.0) | 49.2 (43.5, 54.8) | 47.4 (41.9, 52.9) | 43.1 (37.8, 48.5) | 41.1 (35.8, 46.5) | 7.3 (1.5, 13.1)  | Metropolitan |
| Men    | Gyeonggi-do | Yeongtong-gu   | 38.2 (35.8, 40.6) | 39.6 (34.2, 45.0) | 37.7 (32.4, 43.0) | 39.7 (34.0, 45.4) | 36.5 (31.4, 41.5) | 37.6 (32.2, 43.0) | 2.0 (-3.6, 7.6)  | Metropolitan |
| Men    | Gyeonggi-do | Sujeong-gu     | 47.3 (44.8, 49.8) | 51.2 (45.5, 57.0) | 51.7 (45.9, 57.4) | 45.8 (40.4, 51.1) | 46.4 (41.0, 51.8) | 41.3 (36.0, 46.7) | 9.9 (4.1, 15.7)  | Metropolitan |
| Men    | Gyeonggi-do | Jungwon-gu     | 50.5 (48.0, 53.0) | 54.4 (48.4, 60.3) | 52.8 (47.1, 58.5) | 49.7 (44.2, 55.1) | 49.1 (43.3, 54.9) | 46.8 (41.3, 52.3) | 7.6 (1.9, 13.3)  | Metropolitan |
| Men    | Gyeonggi-do | Bundang-gu     | 33.0 (31.0, 35.1) | 37.6 (32.7, 42.6) | 34.9 (30.3, 39.6) | 32.6 (28.0, 37.2) | 34.8 (30.1, 39.5) | 24.6 (20.6, 28.7) | 13.0 (7.7, 18.3) | Metropolitan |
| Men    | Gyeonggi-do | Uijeongbu-si   | 45.8 (43.3, 48.3) | 43.2 (37.6, 48.8) | 47.3 (41.8, 52.8) | 45.1 (39.4, 50.8) | 46.2 (40.6, 51.7) | 46.9 (41.1, 52.7) | -3.7 (-9.7, 2.3) | Urban        |
| Men    | Gyeonggi-do | Manan-gu       | 44.8 (42.4, 47.2) | 50.1 (44.2, 56.0) | 46.9 (41.5, 52.3) | 43.4 (38.1, 48.7) | 44.1 (39.0, 49.3) | 39.6 (34.4, 44.8) | 10.5 (4.7, 16.3) | Metropolitan |
| Men    | Gyeonggi-do | Dongan-gu      | 38.2 (36.0, 40.5) | 40.0 (34.9, 45.0) | 41.7 (36.4, 46.9) | 39.5 (34.3, 44.6) | 35.1 (30.0, 40.2) | 35.2 (30.4, 39.9) | 4.8 (-0.7, 10.3) | Metropolitan |
| Men    | Gyeonggi-do | Wonmi-gu       | 43.5 (41.0, 45.9) | 46.7 (41.0, 52.5) | 45.0 (39.6, 50.4) | 43.5 (38.0, 49.0) | 41.1 (36.0, 46.1) | 41.2 (35.7, 46.6) | 5.5 (-0.4, 11.4) | Metropolitan |
| Men    | Gyeonggi-do | Sosa-gu        | 40.5 (38.2, 42.9) | 45.7 (40.0, 51.5) | 39.8 (34.7, 44.8) | 40.5 (35.2, 45.8) | 39.0 (33.9, 44.1) | 38.3 (33.2, 43.4) | 7.4 (1.6, 13.2)  | Metropolitan |
| Men    | Gyeonggi-do | Ojeong-gu      | 51.5 (48.9, 54.1) | 54.0 (48.1, 59.9) | 52.0 (46.2, 57.8) | 52.3 (46.5, 58.1) | 51.6 (45.8, 57.4) | 47.3 (41.6, 53.0) | 6.7 (1.0, 12.4)  | Metropolitan |
| Men    | Gyeonggi-do | Gwangmyeong-si | 43.9 (41.5, 46.3) | 46.4 (40.8, 51.9) | 46.7 (41.1, 52.3) | 45.6 (40.1, 51.1) | 41.9 (36.6, 47.1) | 39.0 (34.0, 44.1) | 7.4 (1.7, 13.1)  | Urban        |
| Men    | Gyeonggi-do | Pyeongtaek-si  | 47.4 (45.7, 49.2) | 49.9 (45.8, 54.0) | 49.1 (45.2, 53.1) | 44.3 (40.6, 48.0) | 48.6 (44.7, 52.5) | 45.2 (41.4, 48.9) | 4.7 (0.7, 8.7)   | Urban        |
| Men    | Gyeonggi-do | Dongducheon-si | 50.4 (47.8, 53.0) | 53.7 (47.6, 59.8) | 52.6 (46.5, 58.6) | 49.5 (43.9, 55.1) | 48.5 (42.7, 54.4) | 48.1 (42.2, 53.9) | 5.6 (-0.3, 11.5) | Urban        |
| Men    | Gyeonggi-do | Sangnok-gu     | 45.5 (43.0, 47.9) | 49.4 (43.7, 55.0) | 46.6 (40.9, 52.2) | 48.1 (42.2, 53.9) | 42.3 (37.0, 47.6) | 41.0 (35.7, 46.3) | 8.4 (2.6, 14.2)  | Metropolitan |
| Men    | Gyeonggi-do | Danwon-gu      | 48.1 (45.6, 50.6) | 54.1 (47.9, 60.4) | 49.9 (44.2, 55.6) | 45.1 (39.8, 50.5) | 46.6 (41.2, 52.0) | 45.6 (40.0, 51.3) | 8.5 (2.8, 14.2)  | Metropolitan |
| Men    | Gyeonggi-do | Deogyang-gu    | 44.8 (42.4, 47.2) | 49.8 (43.9, 55.8) | 44.2 (38.8, 49.5) | 44.8 (39.3, 50.2) | 46.8 (41.4, 52.3) | 38.0 (32.9, 43.1) | 11.8 (6.0, 17.6) | Metropolitan |
| Men    | Gyeonggi-do | Ilsandong-gu   | 40.2 (37.8, 42.5) | 41.0 (35.6, 46.5) | 42.6 (37.3, 47.9) | 35.4 (30.5, 40.2) | 40.5 (35.3, 45.8) | 41.3 (35.8, 46.8) | -0.3 (-6.2, 5.6) | Metropolitan |
| Men    | Gyeonggi-do | Ilsanseo-gu    | 40.4 (38.1, 42.8) | 44.8 (39.3, 50.2) | 42.0 (36.8, 47.2) | 42.0 (36.8, 47.3) | 37.0 (32.0, 42.0) | 36.4 (31.4, 41.4) | 8.4 (2.7, 14.1)  | Metropolitan |
| Men    | Gyeonggi-do | Gwacheon-si    | 31.4 (29.3, 33.5) | 38.3 (33.1, 43.6) | 32.0 (27.4, 36.6) | 30.2 (25.5, 34.8) | 26.9 (22.7, 31.2) | 29.9 (25.1, 34.7) | 8.4 (2.7, 14.1)  | Urban        |
| Men    | Gyeonggi-do | Guri-si        | 46.0 (43.5, 48.5) | 52.9 (46.9, 59.0) | 47.0 (41.2, 52.7) | 47.1 (41.5, 52.7) | 42.3 (37.0, 47.6) | 40.4 (35.1, 45.7) | 12.5 (6.6, 18.4) | Urban        |
| Men    | Gyeonggi-do | Namyangju-si   | 46.0 (43.5, 48.5) | 50.2 (44.5, 56.0) | 46.8 (41.2, 52.4) | 45.9 (40.4, 51.4) | 45.5 (40.1, 50.9) | 40.7 (35.3, 46.2) | 9.5 (3.6, 15.4)  | Urban        |
| Men    | Gyeonggi-do | Osan-si        | 49.6 (47.0, 52.2) | 56.7 (50.4, 63.1) | 46.3 (40.9, 51.8) | 48.9 (43.1, 54.6) | 51.7 (45.7, 57.8) | 44.5 (39.0, 50.1) | 12.2 (6.5, 17.9) | Urban        |
| Men    | Gyeonggi-do | Siheung-si     | 50.4 (47.8, 52.9) | 54.0 (48.0, 60.0) | 48.0 (42.7, 53.4) | 51.6 (45.7, 57.5) | 50.6 (45.0, 56.2) | 47.7 (42.1, 53.4) | 6.3 (0.7, 11.9)  | Urban        |
| Men    | Gyeonggi-do | Gunpo-si       | 41.0 (38.7, 43.3) | 43.4 (38.1, 48.8) | 43.7 (38.6, 48.9) | 40.7 (35.6, 45.8) | 41.8 (36.6, 47.0) | 35.1 (30.3, 40.0) | 8.3 (2.6, 14.0)  | Urban        |
| Men    | Gyeonggi-do | Uiwang-si      | 41.4 (39.0, 43.7) | 45.5 (40.0, 51.1) | 43.7 (38.3, 49.0) | 39.3 (34.2, 44.3) | 41.6 (36.5, 46.6) | 36.6 (31.7, 41.4) | 8.9 (3.3, 14.5)  | Urban        |
| Men    | Gyeonggi-do | Hanam-si       | 43.8 (41.4, 46.2) | 46.5 (40.8, 52.2) | 44.4 (39.0, 49.9) | 43.9 (38.6, 49.3) | 41.5 (36.3, 46.7) | 42.3 (36.9, 47.7) | 4.2 (-1.7, 10.1) | Urban        |
| Men    | Gyeonggi-do | Cheoin-gu      | 49.7 (47.2, 52.2) | 51.8 (46.1, 57.6) | 51.2 (45.6, 56.9) | 50.4 (44.9, 56.0) | 49.2 (43.6, 54.9) | 45.8 (40.5, 51.1) | 6.0 (0.4, 11.6)  | Metropolitan |
| Men    | Gyeonggi-do | Giheung-gu     | 38.6 (36.4, 40.9) | 40.6 (35.4, 45.9) | 40.7 (35.7, 45.8) | 37.5 (32.6, 42.4) | 38.5 (33.6, 43.5) | 35.4 (30.6, 40.2) | 5.2 (-0.5, 10.9) | Metropolitan |

(Continued to the next page)

Supplemental Table 3. Continued from the previous page

| Gender | Provinces         | Districts       | Overall           | Q1 (lowest)       | Q2                | Q3                | Q4                | Q5 (highest)      | Q1-Q5             | Urbanity     |
|--------|-------------------|-----------------|-------------------|-------------------|-------------------|-------------------|-------------------|-------------------|-------------------|--------------|
| Men    | Gyeonggi-do       | Suji-gu         | 35.8 (33.6, 37.9) | 36.8 (31.9, 41.8) | 37.3 (32.4, 42.3) | 36.8 (31.9, 41.7) | 36.4 (31.7, 41.1) | 30.8 (26.2, 35.4) | 6.0 (0.4, 11.6)   | Metropolitan |
| Men    | Gyeonggi-do       | Paju-si         | 46.0 (43.5, 48.5) | 46.9 (41.2, 52.7) | 48.0 (42.4, 53.6) | 46.3 (40.8, 51.7) | 42.8 (37.5, 48.0) | 46.3 (40.7, 52.0) | 0.6 (-5.3, 6.5)   | Urban        |
| Men    | Gyeonggi-do       | Icheon-si       | 46.9 (44.5, 49.4) | 53.3 (47.4, 59.2) | 49.7 (44.0, 55.4) | 41.3 (36.1, 46.4) | 47.6 (42.0, 53.1) | 42.7 (37.3, 48.1) | 10.6 (4.9, 16.3)  | Urban        |
| Men    | Gyeonggi-do       | Anseong-si      | 48.8 (46.3, 51.3) | 59.8 (53.6, 65.9) | 50.3 (44.6, 56.1) | 47.7 (42.3, 53.1) | 44.1 (38.7, 49.5) | 41.8 (36.6, 47.1) | 18.0 (12.4, 23.6) | Urban        |
| Men    | Gyeonggi-do       | Gimpo-si        | 46.3 (43.8, 48.7) | 51.9 (46.1, 57.8) | 50.3 (44.6, 56.0) | 44.7 (39.4, 50.0) | 42.2 (37.1, 47.4) | 42.3 (37.1, 47.6) | 9.6 (3.9, 15.3)   | Urban        |
| Men    | Gyeonggi-do       | Hwaseong-si     | 44.2 (41.8, 46.6) | 46.6 (41.1, 52.1) | 48.6 (42.9, 54.4) | 40.4 (35.4, 45.4) | 45.2 (39.7, 50.8) | 40.2 (34.9, 45.5) | 6.4 (0.7, 12.1)   | Urban        |
| Men    | Gyeonggi-do       | Gwangju-si      | 47.8 (45.4, 50.3) | 49.5 (43.9, 55.1) | 47.7 (42.3, 53.1) | 47.2 (41.9, 52.6) | 48.6 (43.0, 54.2) | 46.2 (40.7, 51.6) | 3.3 (-2.4, 9.0)   | Urban        |
| Men    | Gyeonggi-do       | Yangju-si       | 46.9 (44.4, 49.4) | 49.9 (44.2, 55.6) | 49.0 (43.3, 54.6) | 46.3 (40.8, 51.8) | 46.8 (41.4, 52.3) | 42.5 (37.2, 47.8) | 7.4 (1.6, 13.2)   | Urban        |
| Men    | Gyeonggi-do       | Pocheon-si      | 52.7 (50.0, 55.3) | 51.7 (45.6, 57.8) | 57.3 (51.2, 63.4) | 53.8 (47.9, 59.6) | 51.1 (45.4, 56.9) | 49.5 (43.7, 55.3) | 2.2 (-3.7, 8.1)   | Urban        |
| Men    | Gyeonggi-do       | Yeouju-gun      | 47.2 (44.7, 49.7) | 49.7 (43.9, 55.5) | 51.8 (46.0, 57.6) | 46.8 (41.2, 52.3) | 45.2 (39.8, 50.7) | 42.1 (36.6, 47.6) | 7.6 (1.8, 13.4)   | Urban        |
| Men    | Gyeonggi-do       | Yeoncheon-gun   | 51.3 (48.6, 54.0) | 55.8 (49.3, 62.3) | 55.2 (48.9, 61.5) | 55.0 (48.8, 61.1) | 47.8 (41.9, 53.8) | 42.8 (37.4, 48.2) | 13.0 (7.3, 18.7)  | Rural        |
| Men    | Gyeonggi-do       | Gapyeong-gun    | 48.0 (45.3, 50.6) | 51.4 (45.1, 57.7) | 49.5 (43.7, 55.3) | 47.4 (41.6, 53.1) | 46.2 (40.4, 52.1) | 45.1 (39.2, 51.0) | 6.3 (0.4, 12.2)   | Rural        |
| Men    | Gyeonggi-do       | Yangpyeong-gun  | 45.6 (43.0, 48.2) | 46.9 (40.9, 52.9) | 49.0 (43.2, 54.8) | 44.6 (38.9, 50.3) | 45.7 (40.2, 51.3) | 41.0 (35.4, 46.5) | 5.9 (0.1, 11.7)   | Rural        |
| Men    | Gangwon-do        | Chuncheon-si    | 45.9 (43.4, 48.5) | 54.1 (47.7, 60.5) | 47.6 (41.8, 53.4) | 45.1 (39.5, 50.7) | 41.6 (36.3, 47.0) | 41.9 (36.5, 47.4) | 12.2 (6.2, 18.2)  | Urban        |
| Men    | Gangwon-do        | Wonju-si        | 49.5 (47.0, 52.0) | 50.5 (44.7, 56.3) | 49.6 (44.0, 55.2) | 51.9 (46.1, 57.6) | 48.1 (42.7, 53.6) | 46.8 (41.2, 52.3) | 3.7 (-2.1, 9.5)   | Urban        |
| Men    | Gangwon-do        | Gangneung-si    | 49.3 (46.7, 51.9) | 53.0 (46.7, 59.3) | 53.2 (47.1, 59.3) | 50.7 (44.9, 56.4) | 46.4 (40.7, 52.0) | 43.6 (38.1, 49.1) | 9.4 (3.5, 15.3)   | Urban        |
| Men    | Gangwon-do        | Donghae-si      | 46.9 (44.4, 49.4) | 52.2 (46.3, 58.2) | 48.6 (42.9, 54.2) | 46.5 (40.9, 52.1) | 44.0 (38.6, 49.4) | 42.8 (37.3, 48.3) | 9.4 (3.6, 15.2)   | Urban        |
| Men    | Gangwon-do        | Taebaek-si      | 56.1 (53.3, 58.8) | 57.2 (50.8, 63.6) | 58.3 (52.1, 64.5) | 56.0 (49.8, 62.2) | 54.1 (48.2, 60.1) | 54.7 (48.4, 60.9) | 2.5 (-3.3, 8.3)   | Urban        |
| Men    | Gangwon-do        | Sokcho-si       | 48.7 (46.1, 51.4) | 52.8 (46.6, 59.1) | 48.5 (42.8, 54.3) | 53.0 (46.9, 59.1) | 47.5 (41.7, 53.3) | 41.5 (36.0, 47.0) | 11.3 (5.3, 17.3)  | Urban        |
| Men    | Gangwon-do        | Samcheok-si     | 49.2 (46.6, 51.8) | 51.7 (45.6, 57.8) | 53.8 (47.7, 60.0) | 46.5 (40.9, 52.1) | 48.8 (43.0, 54.5) | 45.3 (39.7, 51.0) | 6.4 (0.6, 12.2)   | Urban        |
| Men    | Gangwon-do        | Hongcheon-gun   | 49.7 (47.1, 52.4) | 54.7 (48.4, 61.0) | 48.8 (43.1, 54.5) | 51.0 (45.0, 57.0) | 47.7 (42.0, 53.4) | 46.7 (40.9, 52.5) | 8.0 (2.3, 13.7)   | Rural        |
| Men    | Gangwon-do        | Hoengseong-gun  | 46.4 (43.8, 49.1) | 43.7 (37.9, 49.4) | 46.4 (40.6, 52.3) | 50.4 (44.3, 56.5) | 49.5 (43.4, 55.6) | 41.4 (35.8, 47.1) | 2.3 (-3.5, 8.1)   | Rural        |
| Men    | Gangwon-do        | Pyeongwol-gun   | 50.8 (48.0, 53.5) | 53.8 (47.2, 60.3) | 52.1 (45.9, 58.2) | 48.1 (42.2, 54.0) | 53.9 (47.5, 60.3) | 46.3 (40.3, 52.3) | 7.5 (1.7, 13.3)   | Rural        |
| Men    | Gangwon-do        | Pyeongchang-gun | 49.7 (47.0, 52.4) | 52.0 (45.7, 58.3) | 50.3 (44.2, 56.5) | 47.7 (41.9, 53.6) | 48.9 (43.0, 54.8) | 49.6 (43.4, 55.7) | 2.4 (-3.5, 8.3)   | Rural        |
| Men    | Gangwon-do        | Jeongseon-gun   | 52.3 (49.6, 55.0) | 53.2 (46.8, 59.5) | 55.8 (49.6, 61.9) | 52.8 (46.8, 58.8) | 50.0 (44.2, 55.9) | 50.0 (43.9, 56.0) | 3.2 (-2.6, 9.0)   | Rural        |
| Men    | Gangwon-do        | Cheorwon-gun    | 46.8 (44.2, 49.3) | 47.3 (41.5, 53.2) | 48.6 (43.0, 54.2) | 49.2 (43.3, 55.1) | 46.2 (40.5, 51.8) | 41.9 (36.3, 47.4) | 5.4 (-0.4, 11.2)  | Rural        |
| Men    | Gangwon-do        | Hwacheon-gun    | 49.7 (47.0, 52.4) | 53.5 (47.0, 59.9) | 52.6 (46.6, 58.7) | 50.5 (44.4, 56.5) | 48.3 (42.3, 54.3) | 43.6 (37.8, 49.3) | 9.9 (4.0, 15.8)   | Rural        |
| Men    | Gangwon-do        | Yanggu-gun      | 48.8 (46.1, 51.5) | 49.9 (43.7, 56.1) | 51.5 (45.1, 57.8) | 49.2 (43.3, 55.0) | 47.2 (41.3, 53.1) | 46.8 (40.9, 52.7) | 3.1 (-2.9, 9.1)   | Rural        |
| Men    | Gangwon-do        | Inje-gun        | 48.2 (45.7, 50.8) | 46.4 (40.8, 52.0) | 46.3 (40.8, 51.8) | 49.8 (44.1, 55.5) | 49.3 (43.7, 55.0) | 49.3 (43.5, 55.1) | -2.9 (-8.6, 2.8)  | Rural        |
| Men    | Gangwon-do        | Goseong-gun     | 49.2 (46.5, 52.0) | 55.7 (49.0, 62.5) | 50.9 (44.8, 57.0) | 49.0 (42.8, 55.3) | 42.1 (36.5, 47.7) | 48.5 (42.3, 54.6) | 7.2 (1.3, 13.1)   | Rural        |
| Men    | Gangwon-do        | Yangyang-gun    | 50.9 (48.1, 53.7) | 53.5 (47.0, 60.1) | 46.0 (40.2, 51.8) | 49.0 (42.7, 55.3) | 56.1 (49.6, 62.5) | 50.2 (44.0, 56.5) | 3.3 (-2.6, 9.2)   | Rural        |
| Men    | Chungcheongbuk-do | Cheongju-si     | 43.9 (42.6, 45.3) | 48.9 (45.6, 52.3) | 45.5 (42.4, 48.6) | 45.4 (42.3, 48.6) | 40.3 (37.4, 43.2) | 39.8 (36.9, 42.6) | 9.1 (5.8, 12.4)   | Metropolitan |
| Men    | Chungcheongbuk-do | Chungju-si      | 48.5 (45.9, 51.0) | 47.3 (41.4, 53.2) | 51.7 (45.9, 57.4) | 51.2 (45.5, 56.9) | 47.5 (42.0, 53.0) | 44.4 (38.8, 49.9) | 2.9 (-3.0, 8.8)   | Urban        |
| Men    | Chungcheongbuk-do | Jecheon-si      | 47.7 (45.2, 50.3) | 53.7 (47.5, 59.9) | 49.8 (44.1, 55.6) | 45.5 (39.9, 51.2) | 44.9 (39.4, 50.4) | 44.4 (38.7, 50.2) | 9.3 (3.4, 15.2)   | Urban        |
| Men    | Chungcheongbuk-do | Boeun-gun       | 45.7 (43.0, 48.5) | 51.2 (44.5, 57.8) | 48.7 (42.2, 55.2) | 41.8 (36.3, 47.3) | 40.2 (34.2, 46.1) | 47.8 (41.3, 54.2) | 3.4 (-2.6, 9.4)   | Rural        |
| Men    | Chungcheongbuk-do | Okcheon-gun     | 47.4 (44.8, 50.0) | 50.7 (44.6, 56.8) | 45.9 (40.2, 51.7) | 48.3 (42.6, 54.0) | 49.2 (43.1, 55.4) | 42.3 (36.7, 47.9) | 8.4 (2.7, 14.1)   | Rural        |
| Men    | Chungcheongbuk-do | Yeongdong-gun   | 45.2 (42.6, 47.9) | 51.3 (45.0, 57.5) | 46.4 (40.4, 52.4) | 45.6 (39.8, 51.5) | 42.9 (37.2, 48.5) | 39.5 (33.9, 45.1) | 11.8 (6.0, 17.6)  | Rural        |
| Men    | Chungcheongbuk-do | Jincheon-gun    | 51.1 (48.5, 53.7) | 55.7 (49.6, 61.8) | 50.0 (44.2, 55.7) | 50.9 (45.1, 56.6) | 49.2 (43.5, 54.9) | 49.6 (43.7, 55.4) | 6.1 (0.3, 11.9)   | Rural        |
| Men    | Chungcheongbuk-do | Goesan-gun      | 50.7 (47.9, 53.6) | 45.1 (38.9, 51.3) | 55.3 (48.8, 61.8) | 56.0 (49.4, 62.6) | 50.0 (43.8, 56.2) | 45.8 (39.6, 52.0) | -0.7 (-6.5, 5.1)  | Rural        |
| Men    | Chungcheongbuk-do | Eumseong-gun    | 52.3 (49.7, 54.9) | 54.4 (48.2, 60.5) | 56.6 (50.4, 62.8) | 53.2 (47.4, 59.0) | 51.3 (45.7, 56.9) | 46.3 (40.6, 52.1) | 8.1 (2.4, 13.8)   | Rural        |
| Men    | Chungcheongbuk-do | Danyang-gun     | 47.8 (45.1, 50.4) | 50.6 (44.2, 57.0) | 51.2 (45.2, 57.2) | 47.1 (41.3, 52.9) | 45.6 (39.6, 51.6) | 43.8 (37.8, 49.8) | 6.8 (0.9, 12.7)   | Rural        |
| Men    | Chungcheongbuk-do | Jeungpyeong-gun | 51.1 (48.6, 53.7) | 50.6 (44.7, 56.5) | 51.7 (45.9, 57.5) | 50.8 (45.3, 56.4) | 51.4 (45.6, 57.3) | 50.9 (45.1, 56.7) | -0.3 (-6.1, 5.5)  | Rural        |
| Men    | Chungcheongnam-do | Cheonan-si      | 45.8 (43.3, 48.2) | 50.7 (44.9, 56.6) | 47.6 (42.0, 53.1) | 44.9 (39.4, 50.4) | 42.0 (36.9, 47.1) | 44.0 (38.6, 49.3) | 6.7 (1.0, 12.4)   | Metropolitan |
| Men    | Chungcheongnam-do | Gongju-si       | 45.0 (42.5, 47.5) | 42.0 (36.6, 47.4) | 48.5 (42.8, 54.2) | 49.3 (43.5, 55.2) | 44.6 (39.1, 50.0) | 40.4 (34.7, 46.0) | 1.6 (-4.1, 7.3)   | Urban        |
| Men    | Chungcheongnam-do | Boryeong-si     | 46.4 (43.9, 49.0) | 52.9 (46.6, 59.2) | 47.8 (42.1, 53.5) | 50.3 (44.4, 56.2) | 38.1 (33.0, 43.3) | 43.0 (37.3, 48.6) | 9.9 (4.0, 15.8)   | Urban        |
| Men    | Chungcheongnam-do | Asan-si         | 46.6 (44.2, 49.1) | 51.9 (46.1, 57.7) | 47.2 (41.7, 52.8) | 43.1 (37.8, 48.3) | 47.1 (41.5, 52.6) | 44.2 (38.9, 49.5) | 7.7 (2.1, 13.3)   | Urban        |
| Men    | Chungcheongnam-do | Seosan-si       | 45.7 (43.2, 48.2) | 49.4 (43.6, 55.1) | 49.1 (43.4, 54.8) | 49.0 (43.3, 54.6) | 41.1 (35.8, 46.3) | 40.1 (35.0, 45.2) | 9.3 (3.6, 15.0)   | Urban        |
| Men    | Chungcheongnam-do | Nonsan-si       | 48.0 (45.4, 50.7) | 51.3 (45.1, 57.6) | 48.7 (43.0, 54.5) | 45.3 (39.4, 51.2) | 48.1 (42.4, 53.9) | 46.6 (40.5, 52.8) | 4.7 (-1.3, 10.7)  | Urban        |
| Men    | Chungcheongnam-do | Gyeryong-si     | 38.4 (36.0, 40.7) | 45.2 (39.4, 51.0) | 40.0 (34.8, 45.2) | 34.8 (29.9, 39.8) | 36.2 (31.2, 41.1) | 35.7 (30.5, 40.9) | 9.5 (3.5, 15.5)   | Urban        |
| Men    | Chungcheongnam-do | Geumsan-gun     | 47.2 (44.5, 49.9) | 48.9 (42.8, 55.0) | 46.5 (40.6, 52.4) | 50.4 (44.3, 56.6) | 45.1 (39.1, 51.0) | 44.7 (38.8, 50.6) | 4.2 (-1.7, 10.1)  | Rural        |
| Men    | Chungcheongnam-do | Buyeo-gun       | 46.1 (43.4, 48.9) | 45.9 (39.6, 52.1) | 51.5 (45.0, 57.9) | 43.5 (37.7, 49.4) | 44.0 (38.1, 50.0) | 45.1 (39.0, 51.2) | 0.8 (-5.1, 6.7)   | Rural        |
| Men    | Chungcheongnam-do | Seocheon-gun    | 43.4 (40.7, 46.1) | 49.2 (42.7, 55.7) | 45.6 (39.4, 51.8) | 41.9 (36.0, 47.8) | 40.5 (34.7, 46.2) | 39.9 (34.0, 45.8) | 9.3 (3.3, 15.3)   | Rural        |
| Men    | Chungcheongnam-do | Cheongyang-gun  | 43.5 (40.8, 46.2) | 44.7 (38.5, 50.8) | 44.2 (38.2, 50.1) | 42.2 (36.3, 48.0) | 45.0 (38.8, 51.2) | 41.4 (35.4, 47.4) | 3.3 (-2.6, 9.2)   | Rural        |
| Men    | Chungcheongnam-do | Hongseong-gun   | 45.2 (42.6, 47.8) | 50.3 (44.1, 56.5) | 47.1 (41.2, 53.0) | 44.9 (39.1, 50.7) | 44.2 (38.5, 49.9) | 39.6 (34.2, 45.1) | 10.7 (4.9, 16.5)  | Rural        |

(Continued to the next page)

Supplemental Table 3. Continued from the previous page

| Gender | Provinces         | Districts      | Overall           | Q1 (lowest)       | Q2                | Q3                | Q4                | Q5 (highest)      | Q1-Q5             | Urbanity     |
|--------|-------------------|----------------|-------------------|-------------------|-------------------|-------------------|-------------------|-------------------|-------------------|--------------|
| Men    | Chungcheongnam-do | Yesan-gun      | 46.4 (43.8, 49.1) | 50.3 (44.0, 56.7) | 43.8 (38.0, 49.5) | 45.7 (39.9, 51.5) | 49.9 (43.8, 56.0) | 42.5 (36.6, 48.3) | 7.8 (1.9, 13.7)   | Rural        |
| Men    | Chungcheongnam-do | Taeon-gun      | 43.1 (40.5, 45.7) | 50.8 (44.6, 57.1) | 42.5 (36.5, 48.4) | 41.5 (36.1, 46.9) | 42.9 (37.2, 48.6) | 38.8 (33.2, 44.4) | 12.0 (6.2, 17.8)  | Rural        |
| Men    | Chungcheongnam-do | Dangjin-si     | 45.7 (43.2, 48.1) | 48.0 (42.3, 53.7) | 48.3 (42.7, 53.9) | 43.0 (37.7, 48.2) | 41.2 (36.1, 46.3) | 48.4 (42.6, 54.1) | -0.4 (-6.2, 5.4)  | Urban        |
| Men    | Jeollabuk-do      | Jeonju-si      | 40.3 (38.0, 42.6) | 46.0 (40.4, 51.7) | 40.9 (35.7, 46.0) | 36.8 (31.9, 41.8) | 41.4 (36.3, 46.5) | 36.6 (31.7, 41.6) | 9.4 (3.7, 15.1)   | Metropolitan |
| Men    | Jeollabuk-do      | Gunsan-si      | 44.2 (41.8, 46.6) | 45.7 (40.2, 51.2) | 45.7 (40.3, 51.1) | 45.8 (40.2, 51.4) | 44.7 (39.5, 50.0) | 39.5 (34.4, 44.6) | 6.2 (0.5, 11.9)   | Urban        |
| Men    | Jeollabuk-do      | Iksan-si       | 40.0 (37.7, 42.3) | 44.0 (38.5, 49.4) | 42.1 (36.9, 47.3) | 38.7 (33.8, 43.6) | 38.0 (33.0, 43.1) | 37.7 (32.7, 42.7) | 6.3 (0.7, 11.9)   | Urban        |
| Men    | Jeollabuk-do      | Jeongeup-si    | 48.1 (45.4, 50.7) | 49.6 (43.4, 55.7) | 46.4 (40.6, 52.2) | 53.8 (47.5, 60.1) | 42.7 (37.2, 48.3) | 47.5 (41.5, 53.5) | 2.1 (-3.8, 8.0)   | Urban        |
| Men    | Jeollabuk-do      | Namwon-si      | 41.1 (38.6, 43.6) | 38.7 (33.2, 44.1) | 47.1 (41.2, 53.0) | 43.5 (37.8, 49.2) | 39.1 (33.7, 44.5) | 36.5 (31.3, 41.8) | 2.2 (-3.5, 7.9)   | Urban        |
| Men    | Jeollabuk-do      | Gimje-si       | 43.3 (40.7, 45.8) | 48.9 (42.8, 55.0) | 45.4 (39.6, 51.2) | 43.4 (37.8, 49.0) | 38.8 (33.5, 44.1) | 40.0 (34.3, 45.7) | 8.9 (3.1, 14.7)   | Urban        |
| Men    | Jeollabuk-do      | Wanju-gun      | 43.3 (40.9, 45.6) | 46.4 (40.8, 51.9) | 38.6 (33.6, 43.6) | 46.8 (41.5, 52.1) | 45.2 (39.7, 50.6) | 40.0 (34.9, 45.1) | 6.4 (0.8, 12.0)   | Rural        |
| Men    | Jeollabuk-do      | Jinan-gun      | 44.6 (41.9, 47.4) | 48.9 (42.1, 55.7) | 44.7 (39.0, 50.4) | 44.6 (38.3, 50.8) | 42.4 (36.5, 48.2) | 43.8 (37.5, 50.1) | 5.1 (-1.0, 11.2)  | Rural        |
| Men    | Jeollabuk-do      | Muju-gun       | 48.8 (45.9, 51.6) | 53.9 (47.0, 60.8) | 47.4 (41.5, 53.3) | 55.1 (48.5, 61.7) | 44.4 (38.4, 50.4) | 42.6 (36.5, 48.6) | 11.3 (5.3, 17.3)  | Rural        |
| Men    | Jeollabuk-do      | Jangsu-gun     | 46.7 (43.9, 49.5) | 47.8 (41.3, 54.3) | 49.5 (43.1, 56.0) | 51.6 (45.1, 58.1) | 42.0 (36.2, 47.8) | 42.6 (36.6, 48.6) | 5.2 (-0.8, 11.2)  | Rural        |
| Men    | Jeollabuk-do      | Imsil-gun      | 45.4 (42.7, 48.0) | 44.9 (38.5, 51.4) | 48.3 (42.3, 54.3) | 49.8 (43.4, 56.1) | 45.1 (39.2, 51.0) | 38.1 (32.8, 43.5) | 6.8 (0.8, 12.8)   | Rural        |
| Men    | Jeollabuk-do      | Sunchang-gun   | 43.2 (40.5, 45.9) | 45.1 (38.9, 51.4) | 41.7 (35.9, 47.5) | 42.2 (36.5, 47.9) | 44.7 (38.5, 50.8) | 42.5 (36.5, 48.5) | 2.6 (-3.4, 8.6)   | Rural        |
| Men    | Jeollabuk-do      | Gochang-gun    | 45.1 (42.3, 47.8) | 52.4 (45.6, 59.2) | 49.0 (42.5, 55.5) | 42.3 (36.6, 48.0) | 46.0 (39.8, 52.2) | 36.0 (30.4, 41.6) | 16.4 (10.5, 22.3) | Rural        |
| Men    | Jeollabuk-do      | Buan-gun       | 45.6 (42.9, 48.3) | 48.2 (41.9, 54.6) | 45.9 (39.6, 52.2) | 42.8 (37.2, 48.3) | 46.7 (40.4, 53.0) | 45.3 (38.9, 51.6) | 2.9 (-3.2, 9.0)   | Rural        |
| Men    | Jeollanam-do      | Naju-si        | 45.4 (42.7, 48.0) | 47.1 (41.1, 53.2) | 48.2 (42.1, 54.2) | 44.8 (39.1, 50.6) | 44.2 (38.5, 49.9) | 42.4 (36.6, 48.3) | 4.7 (-1.3, 10.7)  | Urban        |
| Men    | Jeollanam-do      | Mokpo-si       | 43.3 (41.0, 45.7) | 53.6 (47.6, 59.7) | 43.3 (38.0, 48.6) | 38.9 (34.0, 43.8) | 40.4 (35.4, 45.5) | 41.3 (36.1, 46.6) | 12.3 (6.5, 18.1)  | Urban        |
| Men    | Jeollanam-do      | Yeosu-si       | 43.8 (41.4, 46.2) | 50.2 (44.3, 56.1) | 48.1 (42.5, 53.7) | 41.4 (36.2, 46.7) | 40.9 (35.8, 46.1) | 38.8 (33.7, 43.9) | 11.4 (5.7, 17.1)  | Urban        |
| Men    | Jeollanam-do      | Suncheon-si    | 40.1 (37.8, 42.3) | 46.7 (41.0, 52.4) | 38.3 (33.4, 43.3) | 43.5 (38.3, 48.7) | 38.5 (33.5, 43.6) | 33.5 (28.7, 38.3) | 13.2 (7.5, 18.9)  | Urban        |
| Men    | Jeollanam-do      | Gwangyang-si   | 42.5 (40.1, 44.8) | 46.3 (40.7, 51.9) | 46.2 (40.8, 51.6) | 41.4 (36.1, 46.7) | 40.0 (34.9, 45.1) | 38.6 (33.6, 43.7) | 7.7 (2.1, 13.3)   | Urban        |
| Men    | Jeollanam-do      | Damyang-gun    | 43.2 (40.7, 45.8) | 44.8 (38.9, 50.8) | 44.5 (38.9, 50.2) | 46.6 (40.8, 52.4) | 42.5 (37.0, 48.1) | 37.0 (31.5, 42.5) | 7.8 (2.0, 13.6)   | Rural        |
| Men    | Jeollanam-do      | Gokseong-gun   | 43.8 (41.1, 46.6) | 43.5 (37.2, 49.9) | 42.8 (36.9, 48.8) | 47.0 (40.6, 53.4) | 44.5 (38.2, 50.8) | 41.2 (35.0, 47.3) | 2.3 (-3.7, 8.3)   | Rural        |
| Men    | Jeollanam-do      | Gurye-gun      | 43.2 (40.5, 45.9) | 45.7 (39.3, 52.0) | 47.3 (41.0, 53.5) | 43.1 (37.2, 49.0) | 41.4 (35.7, 47.1) | 38.0 (32.1, 43.9) | 7.7 (1.7, 13.7)   | Rural        |
| Men    | Jeollanam-do      | Goheung-gun    | 44.8 (41.9, 47.6) | 47.2 (40.3, 54.1) | 43.2 (37.2, 49.3) | 41.3 (35.3, 47.4) | 44.9 (38.4, 51.3) | 48.8 (41.9, 55.7) | -1.6 (-7.6, 4.4)  | Rural        |
| Men    | Jeollanam-do      | Boseong-gun    | 43.6 (40.8, 46.4) | 40.8 (34.8, 46.9) | 44.4 (38.2, 50.6) | 51.5 (44.9, 58.0) | 39.8 (33.9, 45.8) | 40.4 (34.3, 46.5) | 0.4 (-5.5, 6.3)   | Rural        |
| Men    | Jeollanam-do      | Hwasun-gun     | 45.5 (42.9, 48.1) | 47.5 (41.6, 53.4) | 47.2 (41.4, 53.0) | 49.2 (43.2, 55.1) | 37.7 (32.5, 42.9) | 45.9 (40.0, 51.8) | 1.6 (-4.4, 7.6)   | Rural        |
| Men    | Jeollanam-do      | Jangheung-gun  | 45.0 (42.3, 47.8) | 48.5 (41.9, 55.2) | 51.3 (44.6, 58.0) | 47.1 (40.9, 53.4) | 41.3 (35.5, 47.2) | 36.8 (31.0, 42.7) | 11.7 (5.6, 17.8)  | Rural        |
| Men    | Jeollanam-do      | Gangjin-gun    | 44.7 (41.9, 47.5) | 47.7 (41.0, 54.4) | 51.7 (45.3, 58.2) | 40.4 (34.5, 46.3) | 42.6 (36.6, 48.6) | 40.7 (34.8, 46.6) | 7.0 (1.0, 13.0)   | Rural        |
| Men    | Jeollanam-do      | Haenam-gun     | 43.8 (41.2, 46.5) | 51.2 (44.7, 57.8) | 44.7 (38.8, 50.6) | 42.3 (36.6, 48.0) | 43.6 (37.9, 49.4) | 37.3 (31.6, 43.0) | 13.9 (7.9, 19.9)  | Rural        |
| Men    | Jeollanam-do      | Yeongam-gun    | 44.4 (41.9, 46.9) | 46.3 (40.6, 52.1) | 47.2 (41.5, 52.8) | 43.9 (38.4, 49.4) | 42.7 (37.3, 48.0) | 42.3 (36.8, 47.8) | 4.0 (-1.8, 9.8)   | Rural        |
| Men    | Jeollanam-do      | Muan-gun       | 41.5 (39.1, 43.9) | 43.3 (37.6, 49.1) | 47.9 (42.2, 53.6) | 36.3 (31.3, 41.3) | 43.1 (37.7, 48.4) | 36.9 (31.8, 41.9) | 6.4 (0.6, 12.2)   | Rural        |
| Men    | Jeollanam-do      | Hampyeong-gun  | 48.8 (45.9, 51.7) | 54.5 (47.6, 61.3) | 49.8 (43.3, 56.3) | 47.4 (41.1, 53.7) | 47.8 (41.7, 53.9) | 44.1 (37.7, 50.5) | 10.4 (4.4, 16.4)  | Rural        |
| Men    | Jeollanam-do      | Yeonggwang-gun | 45.8 (43.2, 48.4) | 48.3 (42.2, 54.4) | 50.1 (44.0, 56.2) | 46.1 (40.2, 52.0) | 42.3 (36.7, 47.9) | 42.2 (36.5, 47.9) | 6.1 (0.3, 11.9)   | Rural        |
| Men    | Jeollanam-do      | Jangseong-gun  | 44.5 (41.9, 47.1) | 46.9 (40.7, 53.0) | 50.2 (43.8, 56.5) | 45.8 (40.0, 51.5) | 40.8 (35.2, 46.4) | 38.9 (33.4, 44.3) | 8.0 (2.1, 13.9)   | Rural        |
| Men    | Jeollanam-do      | Wando-gun      | 47.4 (44.6, 50.2) | 50.6 (44.1, 57.2) | 48.4 (42.2, 54.6) | 45.1 (39.0, 51.2) | 47.5 (41.5, 53.6) | 45.3 (38.9, 51.6) | 5.3 (-0.6, 11.2)  | Rural        |
| Men    | Jeollanam-do      | Jindo-gun      | 47.6 (44.8, 50.5) | 46.9 (40.5, 53.2) | 50.2 (43.8, 56.7) | 48.1 (41.8, 54.3) | 43.5 (37.5, 49.4) | 49.4 (42.8, 56.0) | -2.5 (-8.5, 3.5)  | Rural        |
| Men    | Jeollanam-do      | Sinan-gun      | 42.7 (40.0, 45.3) | 46.2 (39.8, 52.7) | 42.1 (36.4, 47.9) | 40.3 (34.5, 46.0) | 39.9 (34.3, 45.5) | 45.2 (38.8, 51.5) | 1.0 (-5.0, 7.0)   | Rural        |
| Men    | Gyeongsangbuk-do  | Nam-gu         | 48.8 (46.3, 51.3) | 52.6 (46.8, 58.4) | 50.4 (44.9, 56.0) | 56.8 (50.8, 62.9) | 45.4 (40.1, 50.8) | 38.6 (33.7, 43.4) | 14.0 (8.5, 19.5)  | Metropolitan |
| Men    | Gyeongsangbuk-do  | Buk-gu         | 44.2 (41.8, 46.6) | 46.8 (41.1, 52.5) | 47.1 (41.7, 52.5) | 44.1 (38.7, 49.4) | 42.2 (36.9, 47.5) | 40.2 (35.0, 45.4) | 6.6 (0.9, 12.3)   | Metropolitan |
| Men    | Gyeongsangbuk-do  | Gyeongju-si    | 44.6 (42.2, 47.1) | 48.2 (42.4, 54.0) | 49.7 (43.9, 55.5) | 47.3 (41.7, 52.9) | 39.7 (34.6, 44.8) | 38.4 (33.2, 43.5) | 9.8 (4.0, 15.6)   | Urban        |
| Men    | Gyeongsangbuk-do  | Gimcheon-si    | 48.8 (46.2, 51.4) | 53.8 (47.7, 59.8) | 50.6 (44.7, 56.6) | 50.2 (44.4, 56.0) | 46.1 (40.3, 51.9) | 43.2 (37.8, 48.7) | 10.6 (4.9, 16.3)  | Urban        |
| Men    | Gyeongsangbuk-do  | Andong-si      | 47.7 (45.1, 50.2) | 50.5 (44.5, 56.5) | 47.7 (41.9, 53.5) | 50.3 (44.4, 56.3) | 45.1 (39.5, 50.7) | 44.7 (39.1, 50.3) | 5.8 (0.0, 11.6)   | Urban        |
| Men    | Gyeongsangbuk-do  | Gumi-si        | 48.8 (47.0, 50.6) | 51.9 (47.4, 56.5) | 49.3 (45.1, 53.4) | 48.8 (44.7, 52.9) | 47.9 (43.9, 51.9) | 46.7 (42.9, 50.6) | 5.2 (1.1, 9.3)    | Urban        |
| Men    | Gyeongsangbuk-do  | Yeongju-si     | 49.3 (46.6, 52.0) | 51.8 (45.6, 58.1) | 50.1 (44.0, 56.2) | 50.9 (45.0, 56.8) | 48.6 (42.6, 54.5) | 45.0 (39.2, 50.7) | 6.8 (1.0, 12.6)   | Urban        |
| Men    | Gyeongsangbuk-do  | Yeongcheon-si  | 48.7 (46.0, 51.4) | 51.2 (44.9, 57.4) | 53.1 (47.0, 59.2) | 48.3 (42.3, 54.2) | 44.6 (38.9, 50.4) | 46.1 (40.2, 52.1) | 5.1 (-0.8, 11.0)  | Urban        |
| Men    | Gyeongsangbuk-do  | Sangju-si      | 48.7 (45.9, 51.4) | 55.1 (48.6, 61.6) | 50.9 (44.9, 57.0) | 46.0 (40.0, 52.0) | 49.3 (43.3, 55.4) | 41.8 (36.1, 47.5) | 13.3 (7.6, 19.0)  | Urban        |
| Men    | Gyeongsangbuk-do  | Mungyeong-si   | 47.6 (44.9, 50.3) | 51.9 (45.3, 58.4) | 54.2 (47.9, 60.6) | 42.9 (37.0, 48.9) | 43.9 (38.2, 49.6) | 45.0 (38.9, 51.0) | 6.9 (0.9, 12.9)   | Urban        |
| Men    | Gyeongsangbuk-do  | Gyeongsan-si   | 45.9 (43.5, 48.3) | 48.9 (43.2, 54.5) | 47.8 (42.4, 53.3) | 46.1 (40.7, 51.5) | 43.6 (38.3, 48.9) | 43.6 (38.4, 48.8) | 5.3 (-0.4, 11.0)  | Urban        |
| Men    | Gyeongsangbuk-do  | Gunwi-gun      | 51.4 (48.4, 54.5) | 51.9 (44.6, 59.2) | 55.9 (48.9, 63.0) | 50.7 (44.2, 57.2) | 48.3 (41.8, 54.7) | 50.2 (43.2, 57.2) | 1.7 (-4.4, 7.8)   | Rural        |
| Men    | Gyeongsangbuk-do  | Uiseong-gun    | 50.6 (47.6, 53.6) | 50.9 (44.0, 57.9) | 53.4 (46.2, 60.6) | 50.3 (44.0, 56.6) | 53.2 (46.2, 60.2) | 45.0 (38.5, 51.6) | 5.9 (0.0, 11.8)   | Rural        |
| Men    | Gyeongsangbuk-do  | Cheongsong-gun | 49.0 (46.1, 51.9) | 49.8 (43.0, 56.6) | 52.1 (45.6, 58.7) | 50.5 (43.8, 57.1) | 47.6 (41.2, 53.9) | 44.9 (38.4, 51.4) | 4.9 (-1.2, 11.0)  | Rural        |
| Men    | Gyeongsangbuk-do  | Yeongyang-gun  | 48.0 (45.1, 50.8) | 52.2 (45.4, 59.0) | 51.3 (44.7, 57.8) | 48.8 (42.5, 55.1) | 43.4 (37.3, 49.5) | 44.2 (38.0, 50.4) | 8.0 (2.0, 14.0)   | Rural        |

(Continued to the next page)

Supplemental Table 3. Continued from the previous page

| Gender | Provinces        | Districts       | Overall           | Q1 (lowest)       | Q2                | Q3                | Q4                | Q5 (highest)      | Q1-Q5             | Urbanity     |
|--------|------------------|-----------------|-------------------|-------------------|-------------------|-------------------|-------------------|-------------------|-------------------|--------------|
| Men    | Gyeongsangbuk-do | Yeongdeok-gun   | 47.5 (44.6, 50.5) | 52.0 (45.0, 59.0) | 54.5 (47.7, 61.2) | 46.8 (40.3, 53.3) | 40.4 (34.3, 46.4) | 44.4 (38.0, 50.8) | 7.6 (1.4, 13.8)   | Rural        |
| Men    | Gyeongsangbuk-do | Cheongdo-gun    | 45.6 (42.8, 48.4) | 47.8 (41.2, 54.3) | 48.6 (42.3, 54.9) | 46.2 (40.1, 52.4) | 44.9 (38.7, 51.0) | 40.0 (34.1, 45.9) | 7.8 (1.8, 13.8)   | Rural        |
| Men    | Gyeongsangbuk-do | Goryeong-gun    | 49.2 (46.5, 52.0) | 51.9 (45.5, 58.2) | 50.5 (44.2, 56.7) | 47.0 (41.2, 52.7) | 49.0 (42.9, 55.1) | 48.4 (42.0, 54.8) | 3.5 (-2.5, 9.5)   | Rural        |
| Men    | Gyeongsangbuk-do | Seongju-gun     | 52.2 (49.4, 55.1) | 54.5 (47.8, 61.2) | 52.8 (46.5, 59.2) | 49.8 (43.5, 56.1) | 52.3 (45.9, 58.7) | 51.7 (45.3, 58.1) | 2.8 (-3.1, 8.7)   | Rural        |
| Men    | Gyeongsangbuk-do | Chilgok-gun     | 51.1 (48.5, 53.6) | 56.5 (50.5, 62.6) | 52.1 (46.2, 58.0) | 50.0 (44.3, 55.7) | 51.5 (45.8, 57.2) | 45.3 (39.8, 50.8) | 11.2 (5.5, 16.9)  | Rural        |
| Men    | Gyeongsangbuk-do | Yecheon-gun     | 50.2 (47.3, 53.1) | 54.4 (47.4, 61.4) | 55.3 (48.4, 62.2) | 45.5 (39.5, 51.5) | 48.1 (41.8, 54.4) | 48.9 (42.2, 55.5) | 5.5 (-0.4, 11.4)  | Rural        |
| Men    | Gyeongsangbuk-do | Bonghwa-gun     | 48.3 (45.4, 51.2) | 47.8 (41.5, 54.1) | 50.8 (44.2, 57.3) | 52.2 (45.5, 58.8) | 48.8 (42.5, 55.1) | 41.2 (35.0, 47.4) | 6.6 (0.7, 12.5)   | Rural        |
| Men    | Gyeongsangbuk-do | Uljin-gun       | 42.2 (39.7, 44.7) | 51.4 (44.9, 57.8) | 40.2 (34.7, 45.7) | 49.7 (43.7, 55.6) | 38.4 (33.0, 43.8) | 31.2 (26.4, 36.1) | 20.2 (14.4, 26.0) | Rural        |
| Men    | Gyeongsangbuk-do | Ulleung-gun     | 45.5 (42.9, 48.1) | 50.1 (43.8, 56.4) | 46.0 (40.1, 51.9) | 48.5 (42.5, 54.5) | 44.9 (39.2, 50.7) | 37.7 (32.3, 43.2) | 12.4 (6.4, 18.4)  | Rural        |
| Men    | Gyeongsangnam-do | Changwon-si     | 42.6 (40.2, 45.0) | 45.1 (39.5, 50.8) | 44.6 (39.0, 50.3) | 42.6 (37.3, 48.0) | 39.5 (34.4, 44.7) | 41.2 (35.6, 46.7) | 3.9 (-1.7, 9.5)   | Metropolitan |
| Men    | Gyeongsangnam-do | Masan-si        | 46.3 (43.8, 48.7) | 53.6 (47.5, 59.6) | 47.9 (42.4, 53.4) | 47.6 (42.1, 53.2) | 43.3 (38.0, 48.7) | 39.0 (34.0, 44.1) | 14.6 (8.9, 20.3)  | Metropolitan |
| Men    | Gyeongsangnam-do | Jinju-si        | 42.7 (40.3, 45.1) | 50.0 (44.0, 55.9) | 45.5 (39.9, 51.0) | 42.0 (36.8, 47.2) | 37.6 (32.7, 42.6) | 38.4 (33.3, 43.6) | 11.6 (5.8, 17.4)  | Urban        |
| Men    | Gyeongsangnam-do | Jinhae-si       | 46.5 (44.0, 49.0) | 47.5 (41.7, 53.3) | 51.9 (46.2, 57.6) | 44.9 (39.4, 50.3) | 45.4 (40.1, 50.7) | 43.0 (37.6, 48.5) | 4.5 (-1.4, 10.4)  | Metropolitan |
| Men    | Gyeongsangnam-do | Tongyeong-si    | 46.2 (43.7, 48.6) | 49.8 (44.0, 55.6) | 45.5 (40.2, 50.7) | 43.3 (38.0, 48.5) | 48.2 (42.6, 53.7) | 44.5 (39.1, 49.8) | 5.3 (-0.5, 11.1)  | Urban        |
| Men    | Gyeongsangnam-do | Sacheon-si      | 45.5 (43.0, 48.0) | 51.0 (45.0, 57.1) | 41.8 (36.4, 47.2) | 47.0 (41.5, 52.6) | 47.3 (41.7, 52.9) | 39.9 (34.7, 45.2) | 11.1 (5.3, 16.9)  | Urban        |
| Men    | Gyeongsangnam-do | Gimhae-si       | 46.7 (44.2, 49.2) | 50.3 (44.3, 56.3) | 47.1 (41.8, 52.5) | 47.1 (41.4, 52.8) | 43.7 (38.4, 48.9) | 45.9 (40.3, 51.5) | 4.4 (-1.3, 10.1)  | Urban        |
| Men    | Gyeongsangnam-do | Miryang-si      | 46.1 (43.5, 48.7) | 54.3 (47.9, 60.8) | 49.6 (43.6, 55.6) | 46.8 (41.0, 52.6) | 38.8 (33.5, 44.0) | 40.9 (35.3, 46.5) | 13.4 (7.6, 19.2)  | Urban        |
| Men    | Gyeongsangnam-do | Geoje-si        | 47.4 (44.9, 49.8) | 54.3 (48.5, 60.1) | 47.4 (41.9, 52.9) | 50.3 (44.6, 55.9) | 43.2 (38.1, 48.4) | 42.4 (37.3, 47.6) | 11.9 (6.4, 17.4)  | Urban        |
| Men    | Gyeongsangnam-do | Yangsang-si     | 49.6 (47.1, 52.1) | 53.1 (47.3, 58.9) | 49.6 (43.9, 55.2) | 47.7 (42.5, 52.9) | 51.6 (45.8, 57.5) | 45.9 (40.5, 51.3) | 7.2 (1.6, 12.8)   | Urban        |
| Men    | Gyeongsangnam-do | Uiryeong-gun    | 45.8 (42.9, 48.7) | 52.8 (45.6, 59.9) | 46.7 (40.4, 52.9) | 47.0 (40.7, 53.3) | 44.5 (38.2, 50.8) | 38.1 (32.2, 44.1) | 14.7 (8.5, 20.9)  | Rural        |
| Men    | Gyeongsangnam-do | Haman-gun       | 45.7 (43.2, 48.2) | 49.6 (43.6, 55.6) | 45.3 (39.7, 50.9) | 44.0 (38.6, 49.4) | 43.4 (38.0, 48.8) | 47.0 (41.1, 52.8) | 2.6 (-3.3, 8.5)   | Rural        |
| Men    | Gyeongsangnam-do | Changnyeong-gun | 50.2 (47.4, 53.0) | 54.4 (47.8, 61.0) | 48.6 (42.5, 54.6) | 52.0 (45.8, 58.2) | 52.2 (45.9, 58.5) | 43.7 (37.9, 49.5) | 10.7 (4.8, 16.6)  | Rural        |
| Men    | Gyeongsangnam-do | Goseong-gun     | 50.2 (47.4, 52.9) | 52.3 (45.9, 58.7) | 52.1 (45.8, 58.4) | 50.4 (44.3, 56.5) | 48.1 (42.1, 54.2) | 47.8 (41.8, 53.9) | 4.5 (-1.5, 10.5)  | Rural        |
| Men    | Gyeongsangnam-do | Namhae-gun      | 46.0 (43.0, 48.9) | 46.6 (39.9, 53.4) | 46.7 (40.1, 53.4) | 48.8 (42.0, 55.6) | 45.1 (38.8, 51.4) | 42.8 (36.5, 49.2) | 3.8 (-2.3, 9.9)   | Rural        |
| Men    | Gyeongsangnam-do | Hadong-gun      | 46.8 (44.1, 49.6) | 50.5 (43.9, 57.2) | 49.3 (42.9, 55.6) | 48.4 (42.2, 54.6) | 42.4 (36.6, 48.2) | 43.7 (37.8, 49.6) | 6.8 (0.8, 12.8)   | Rural        |
| Men    | Gyeongsangnam-do | Sancheong-gun   | 43.8 (41.0, 46.6) | 44.8 (38.2, 51.4) | 47.2 (41.1, 53.4) | 46.3 (39.7, 52.8) | 37.3 (31.7, 42.9) | 42.9 (36.5, 49.4) | 1.9 (-4.3, 8.1)   | Rural        |
| Men    | Gyeongsangnam-do | Hamyang-gun     | 43.7 (41.0, 46.4) | 45.8 (39.4, 52.3) | 42.0 (36.1, 47.8) | 46.9 (40.6, 53.3) | 45.5 (39.3, 51.6) | 38.0 (32.3, 43.7) | 7.8 (1.8, 13.8)   | Rural        |
| Men    | Gyeongsangnam-do | Geochang-gun    | 45.7 (43.1, 48.4) | 53.2 (46.7, 59.7) | 52.5 (46.3, 58.8) | 43.3 (37.5, 49.1) | 39.1 (33.7, 44.4) | 40.6 (34.8, 46.3) | 12.6 (6.7, 18.5)  | Rural        |
| Men    | Gyeongsangnam-do | Hapcheon-gun    | 45.9 (43.1, 48.7) | 50.9 (44.1, 57.8) | 47.4 (41.1, 53.7) | 51.1 (44.5, 57.8) | 39.8 (34.0, 45.5) | 41.0 (34.8, 47.2) | 9.9 (3.8, 16.0)   | Rural        |
| Men    | Jeju-do          | Jeju-si         | 48.1 (46.6, 49.6) | 53.1 (49.4, 56.8) | 50.8 (47.3, 54.4) | 49.4 (45.9, 52.9) | 45.2 (42.0, 48.4) | 42.9 (39.9, 46.0) | 10.2 (6.8, 13.6)  | Urban        |
| Men    | Jeju-do          | Seogwipo-si     | 49.3 (47.8, 50.9) | 52.6 (48.9, 56.3) | 52.1 (48.5, 55.8) | 48.9 (45.5, 52.3) | 46.5 (43.1, 49.9) | 46.9 (43.4, 50.3) | 5.7 (2.1, 9.3)    | Urban        |
| Women  | Seoul            | Jongno-gu       | 4.1 (3.4, 4.7)    | 5.5 (3.7, 7.2)    | 3.4 (2.0, 4.8)    | 5.5 (3.7, 7.2)    | 4.4 (2.9, 5.9)    | 1.8 (0.8, 2.7)    | 3.7 (1.8, 5.6)    | Metropolitan |
| Women  | Seoul            | Jung-gu         | 4.6 (3.8, 5.3)    | 7.0 (4.9, 9.1)    | 6.2 (4.3, 8.1)    | 3.6 (2.2, 5.1)    | 2.8 (1.5, 4.1)    | 3.4 (1.9, 4.8)    | 3.6 (1.2, 6.0)    | Metropolitan |
| Women  | Seoul            | Yongsan-gu      | 4.9 (4.1, 5.6)    | 7.6 (5.5, 9.7)    | 6.0 (4.2, 7.8)    | 4.6 (3.0, 6.1)    | 3.4 (2.1, 4.8)    | 2.9 (1.6, 4.1)    | 4.7 (2.4, 7.0)    | Metropolitan |
| Women  | Seoul            | Seongdong-gu    | 3.9 (3.3, 4.6)    | 5.2 (3.4, 6.9)    | 3.3 (2.0, 4.7)    | 3.2 (1.9, 4.5)    | 4.7 (3.1, 6.3)    | 3.3 (1.9, 4.7)    | 1.9 (-0.3, 4.1)   | Metropolitan |
| Women  | Seoul            | Gwangjin-gu     | 3.5 (2.9, 4.1)    | 5.1 (3.4, 6.8)    | 3.8 (2.4, 5.2)    | 4.2 (2.7, 5.8)    | 1.8 (0.9, 2.8)    | 2.4 (1.3, 3.5)    | 2.7 (0.7, 4.7)    | Metropolitan |
| Women  | Seoul            | Dongdaemun-gu   | 4.1 (3.4, 4.8)    | 7.3 (5.2, 9.4)    | 4.8 (3.2, 6.4)    | 3.1 (1.8, 4.4)    | 3.4 (2.0, 4.8)    | 2.3 (1.2, 3.4)    | 5.0 (2.7, 7.3)    | Metropolitan |
| Women  | Seoul            | Jungnang-gu     | 3.9 (3.3, 4.5)    | 5.7 (3.9, 7.5)    | 4.7 (3.1, 6.2)    | 2.0 (1.0, 3.0)    | 4.5 (3.0, 6.0)    | 2.5 (1.3, 3.6)    | 3.2 (1.1, 5.3)    | Metropolitan |
| Women  | Seoul            | Seongbuk-gu     | 3.7 (3.1, 4.4)    | 4.1 (2.6, 5.6)    | 4.0 (2.9, 5.9)    | 4.8 (3.2, 6.4)    | 2.7 (1.5, 3.9)    | 2.6 (1.4, 3.7)    | 1.5 (-0.4, 3.4)   | Metropolitan |
| Women  | Seoul            | Gangbuk-gu      | 4.9 (4.2, 5.7)    | 7.5 (5.5, 9.6)    | 5.7 (4.0, 7.5)    | 3.2 (1.9, 4.5)    | 4.2 (2.7, 5.7)    | 4.2 (2.6, 5.8)    | 3.3 (0.8, 5.8)    | Metropolitan |
| Women  | Seoul            | Dobong-gu       | 3.3 (2.7, 3.9)    | 5.0 (3.3, 6.6)    | 3.8 (2.4, 5.2)    | 3.2 (1.9, 4.4)    | 1.4 (0.5, 2.2)    | 3.3 (2.0, 4.6)    | 1.7 (-0.4, 3.8)   | Metropolitan |
| Women  | Seoul            | Nowon-gu        | 3.0 (2.4, 3.6)    | 4.8 (3.2, 6.4)    | 2.5 (1.4, 3.6)    | 3.4 (2.0, 4.7)    | 1.8 (0.8, 2.8)    | 2.5 (1.3, 3.7)    | 2.3 (0.3, 4.3)    | Metropolitan |
| Women  | Seoul            | Eunpyeong-gu    | 4.2 (3.5, 4.9)    | 7.5 (5.5, 9.5)    | 3.3 (2.0, 4.7)    | 3.1 (1.8, 4.3)    | 4.8 (3.2, 6.4)    | 2.4 (1.3, 3.6)    | 5.1 (2.8, 7.4)    | Metropolitan |
| Women  | Seoul            | Seodaemun-gu    | 3.9 (3.3, 4.6)    | 6.1 (4.3, 8.0)    | 4.4 (2.8, 5.9)    | 4.2 (2.7, 5.6)    | 1.9 (0.9, 3.0)    | 3.1 (1.8, 4.4)    | 3.0 (0.8, 5.2)    | Metropolitan |
| Women  | Seoul            | Mapo-gu         | 4.5 (3.8, 5.2)    | 6.4 (4.5, 8.3)    | 5.6 (3.8, 7.4)    | 3.9 (2.5, 5.3)    | 3.5 (2.1, 4.8)    | 3.2 (1.9, 4.5)    | 3.2 (1.0, 5.4)    | Metropolitan |
| Women  | Seoul            | Yangcheon-gu    | 2.1 (1.6, 2.6)    | 5.4 (3.7, 7.2)    | 1.8 (0.8, 2.7)    | 1.9 (0.9, 2.9)    | 0.8 (0.1, 1.5)    | 0.9 (0.2, 1.6)    | 4.5 (2.7, 6.3)    | Metropolitan |
| Women  | Seoul            | Gangseo-gu      | 3.3 (2.7, 3.9)    | 4.0 (3.1, 6.3)    | 4.1 (2.6, 5.6)    | 2.7 (1.6, 3.9)    | 2.8 (1.5, 4.0)    | 2.2 (1.1, 3.3)    | 2.5 (0.6, 4.4)    | Metropolitan |
| Women  | Seoul            | Guro-gu         | 2.9 (2.3, 3.4)    | 4.3 (2.8, 5.9)    | 3.5 (2.2, 4.8)    | 2.2 (1.1, 3.3)    | 2.5 (1.4, 3.7)    | 1.8 (0.8, 2.8)    | 2.5 (0.7, 4.3)    | Metropolitan |
| Women  | Seoul            | Geumcheon-gu    | 3.7 (3.0, 4.3)    | 5.4 (3.6, 7.2)    | 5.3 (3.6, 7.0)    | 3.3 (2.0, 4.6)    | 2.7 (1.5, 3.9)    | 1.5 (0.5, 2.4)    | 3.9 (2.0, 5.8)    | Metropolitan |
| Women  | Seoul            | Yeongdeungpo-gu | 3.0 (2.4, 3.6)    | 4.6 (3.0, 6.2)    | 3.3 (1.9, 4.6)    | 2.4 (1.2, 3.5)    | 2.7 (1.5, 4.0)    | 1.9 (0.9, 2.9)    | 2.7 (0.8, 4.6)    | Metropolitan |
| Women  | Seoul            | Dongjak-gu      | 2.7 (2.1, 3.2)    | 5.5 (3.7, 7.3)    | 3.2 (1.8, 4.5)    | 2.1 (1.0, 3.2)    | 1.0 (0.3, 1.7)    | 1.8 (0.8, 2.8)    | 3.7 (1.7, 5.7)    | Metropolitan |
| Women  | Seoul            | Gwanak-gu       | 4.6 (3.9, 5.4)    | 6.8 (4.8, 8.9)    | 4.8 (3.1, 6.5)    | 5.0 (3.4, 6.7)    | 3.6 (2.2, 5.0)    | 3.0 (1.7, 4.3)    | 3.8 (1.5, 6.1)    | Metropolitan |
| Women  | Seoul            | Seocho-gu       | 2.4 (1.9, 2.9)    | 3.8 (2.4, 5.3)    | 3.0 (1.8, 4.3)    | 1.7 (0.8, 2.6)    | 1.9 (0.9, 2.9)    | 1.3 (0.5, 2.2)    | 2.5 (0.8, 4.2)    | Metropolitan |
| Women  | Seoul            | Gangnam-gu      | 4.9 (4.2, 5.6)    | 7.2 (5.2, 9.1)    | 6.1 (4.3, 7.9)    | 3.4 (2.1, 4.7)    | 3.9 (2.5, 5.2)    | 4.1 (2.6, 5.6)    | 3.1 (0.7, 5.5)    | Metropolitan |

(Continued to the next page)

Supplemental Table 3. Continued from the previous page

| Gender | Provinces   | Districts    | Overall        | Q1 (lowest)     | Q2             | Q3             | Q4             | Q5 (highest)   | Q1-Q5            | Urbanity     |
|--------|-------------|--------------|----------------|-----------------|----------------|----------------|----------------|----------------|------------------|--------------|
| Women  | Seoul       | Songpa-gu    | 2.4 (1.9, 2.9) | 4.6 (3.0, 6.2)  | 2.2 (1.1, 3.3) | 2.6 (1.4, 3.8) | 1.3 (0.5, 2.1) | 1.3 (0.5, 2.2) | 3.3 (1.5, 5.1)   | Metropolitan |
| Women  | Seoul       | Gangdong-gu  | 4.3 (3.6, 5.0) | 5.8 (4.0, 7.6)  | 6.1 (4.2, 7.9) | 4.0 (2.6, 5.5) | 3.0 (1.7, 4.3) | 2.8 (1.6, 4.0) | 3.0 (0.8, 5.2)   | Metropolitan |
| Women  | Busan       | Jung-gu      | 5.2 (4.4, 6.0) | 8.8 (6.4, 11.1) | 5.9 (4.0, 7.7) | 4.2 (2.6, 5.8) | 5.0 (3.3, 6.7) | 2.3 (1.2, 3.5) | 6.5 (4.1, 8.9)   | Metropolitan |
| Women  | Busan       | Seo-gu       | 4.3 (3.6, 5.0) | 7.7 (5.5, 9.8)  | 3.8 (2.4, 5.2) | 4.5 (2.8, 6.1) | 3.3 (1.9, 4.6) | 2.3 (1.2, 3.4) | 5.4 (3.1, 7.7)   | Metropolitan |
| Women  | Busan       | Dong-gu      | 4.0 (3.3, 4.7) | 5.3 (3.6, 6.9)  | 4.5 (2.9, 6.0) | 4.5 (2.8, 6.1) | 2.3 (1.1, 3.5) | 3.5 (2.0, 4.9) | 1.8 (-0.3, 3.9)  | Metropolitan |
| Women  | Busan       | Yeongdo-gu   | 3.7 (3.0, 4.3) | 6.0 (4.2, 7.9)  | 5.0 (3.3, 6.7) | 2.5 (1.4, 3.6) | 2.7 (1.5, 3.8) | 2.2 (1.0, 3.3) | 3.8 (1.7, 5.9)   | Metropolitan |
| Women  | Busan       | Busanjin-gu  | 3.8 (3.2, 4.5) | 6.5 (4.7, 8.4)  | 4.4 (2.8, 5.9) | 3.6 (2.2, 5.0) | 2.7 (1.5, 3.8) | 1.8 (0.9, 2.8) | 4.7 (2.6, 6.8)   | Metropolitan |
| Women  | Busan       | Dongnae-gu   | 2.5 (2.0, 3.0) | 3.7 (2.3, 5.2)  | 3.1 (1.8, 4.4) | 1.6 (0.7, 2.5) | 2.2 (1.1, 3.3) | 1.9 (0.8, 3.0) | 1.8 (0.1, 3.5)   | Metropolitan |
| Women  | Busan       | Nam-gu       | 2.8 (2.2, 3.3) | 5.3 (3.5, 7.0)  | 3.1 (1.8, 4.4) | 2.3 (1.2, 3.4) | 2.2 (1.2, 3.2) | 1.1 (0.3, 2.0) | 4.2 (2.3, 6.1)   | Metropolitan |
| Women  | Busan       | Buk-gu       | 2.7 (2.2, 3.3) | 4.6 (3.0, 6.3)  | 2.8 (1.5, 4.1) | 2.4 (1.3, 3.6) | 2.3 (1.2, 3.4) | 1.4 (0.4, 2.3) | 3.2 (1.4, 5.0)   | Metropolitan |
| Women  | Busan       | Haeundae-gu  | 3.8 (3.1, 4.4) | 7.7 (5.6, 9.7)  | 4.3 (2.7, 5.8) | 2.7 (1.5, 4.0) | 2.7 (1.5, 3.9) | 1.6 (0.7, 2.6) | 6.1 (3.9, 8.3)   | Metropolitan |
| Women  | Busan       | Saha-gu      | 2.7 (2.1, 3.2) | 5.0 (3.3, 6.6)  | 3.6 (2.2, 4.9) | 1.9 (0.9, 2.9) | 1.4 (0.5, 2.3) | 1.6 (0.7, 2.5) | 3.4 (1.5, 5.3)   | Metropolitan |
| Women  | Busan       | Geumjeong-gu | 2.5 (1.9, 3.0) | 5.5 (3.7, 7.3)  | 2.9 (1.6, 4.2) | 1.9 (0.9, 3.0) | 1.3 (0.4, 2.1) | 0.9 (0.2, 1.6) | 4.6 (2.7, 6.5)   | Metropolitan |
| Women  | Busan       | Gangseo-gu   | 2.3 (1.8, 2.8) | 3.6 (2.1, 5.0)  | 3.3 (2.0, 4.5) | 1.7 (0.7, 2.6) | 1.7 (0.8, 2.7) | 1.0 (0.3, 1.7) | 2.6 (1.0, 4.2)   | Metropolitan |
| Women  | Busan       | Yeonje-gu    | 2.7 (2.2, 3.3) | 4.8 (3.2, 6.5)  | 2.4 (1.3, 3.5) | 2.9 (1.6, 4.3) | 1.7 (0.8, 2.6) | 2.0 (0.9, 3.1) | 2.8 (0.9, 4.7)   | Metropolitan |
| Women  | Busan       | Suyeong-gu   | 2.8 (2.2, 3.3) | 2.7 (1.5, 3.9)  | 3.6 (2.2, 5.0) | 2.7 (1.5, 3.9) | 3.5 (2.1, 4.9) | 1.3 (0.4, 2.2) | 1.4 (0.0, 2.8)   | Metropolitan |
| Women  | Busan       | Sasang-gu    | 4.1 (3.4, 4.8) | 7.2 (5.1, 9.4)  | 5.2 (3.5, 6.9) | 4.1 (2.6, 5.6) | 2.1 (0.9, 3.3) | 2.2 (1.1, 3.3) | 5.0 (2.7, 7.3)   | Metropolitan |
| Women  | Busan       | Gijang-gun   | 3.4 (2.8, 4.0) | 3.3 (1.9, 4.6)  | 3.6 (2.2, 5.0) | 4.1 (2.6, 5.5) | 2.8 (1.6, 4.0) | 3.3 (2.0, 4.6) | 0.0 (-1.9, 1.9)  | Rural        |
| Women  | Daegu       | Jung-gu      | 4.5 (3.8, 5.3) | 7.7 (5.5, 9.9)  | 5.3 (3.6, 7.0) | 3.6 (2.2, 5.0) | 3.8 (2.3, 5.2) | 2.4 (1.2, 3.6) | 5.3 (3.0, 7.6)   | Metropolitan |
| Women  | Daegu       | Dong-gu      | 3.4 (2.8, 4.0) | 4.5 (2.9, 6.1)  | 3.0 (1.7, 4.2) | 4.4 (2.8, 5.9) | 2.4 (1.2, 3.5) | 2.6 (1.5, 3.8) | 1.9 (-0.1, 3.9)  | Metropolitan |
| Women  | Daegu       | Seo-gu       | 3.3 (2.7, 3.9) | 4.6 (2.9, 6.3)  | 3.8 (2.3, 5.2) | 3.2 (1.9, 4.6) | 2.7 (1.5, 3.9) | 2.4 (1.2, 3.6) | 2.2 (0.2, 4.2)   | Metropolitan |
| Women  | Daegu       | Nam-gu       | 4.5 (3.8, 5.2) | 5.8 (4.0, 7.6)  | 5.2 (3.5, 6.9) | 3.6 (2.2, 5.0) | 4.9 (3.3, 6.6) | 3.0 (1.6, 4.3) | 2.8 (0.7, 4.9)   | Metropolitan |
| Women  | Daegu       | Buk-gu       | 2.2 (1.7, 2.7) | 4.0 (2.4, 5.5)  | 2.5 (1.3, 3.7) | 1.9 (0.9, 3.0) | 1.1 (0.3, 1.9) | 1.6 (0.6, 2.5) | 2.4 (0.6, 4.2)   | Metropolitan |
| Women  | Daegu       | Suseong-gu   | 3.1 (2.5, 3.6) | 6.8 (4.8, 8.8)  | 3.2 (1.8, 4.5) | 2.7 (1.5, 3.9) | 1.9 (0.9, 3.0) | 0.9 (0.2, 1.6) | 5.9 (3.9, 7.9)   | Metropolitan |
| Women  | Daegu       | Dalseo-gu    | 2.4 (1.9, 2.9) | 4.0 (2.5, 5.5)  | 3.2 (1.9, 4.5) | 2.4 (1.2, 3.6) | 1.0 (0.2, 1.7) | 1.4 (0.5, 2.3) | 2.6 (0.9, 4.3)   | Metropolitan |
| Women  | Daegu       | Dalseong-gun | 2.3 (1.8, 2.8) | 3.1 (1.8, 4.5)  | 3.4 (2.0, 4.8) | 1.8 (0.8, 2.7) | 1.4 (0.5, 2.2) | 1.9 (0.9, 2.9) | 1.2 (-0.5, 2.9)  | Rural        |
| Women  | Incheon     | Jung-gu      | 5.9 (5.1, 6.7) | 7.7 (5.5, 9.9)  | 7.4 (5.4, 9.4) | 5.3 (3.5, 7.1) | 4.5 (2.9, 6.1) | 4.7 (3.0, 6.3) | 3.0 (0.4, 5.6)   | Metropolitan |
| Women  | Incheon     | Dong-gu      | 3.7 (3.0, 4.3) | 5.7 (3.8, 7.7)  | 3.8 (2.4, 5.3) | 4.2 (2.6, 5.7) | 2.2 (1.0, 3.3) | 2.5 (1.3, 3.7) | 3.2 (1.1, 5.3)   | Metropolitan |
| Women  | Incheon     | Nam-gu       | 5.2 (4.4, 5.9) | 7.9 (5.7, 10.1) | 5.7 (3.9, 7.5) | 4.2 (2.6, 5.8) | 3.9 (2.4, 5.4) | 4.2 (2.6, 5.7) | 3.7 (1.1, 6.3)   | Metropolitan |
| Women  | Incheon     | Yeonsu-gu    | 3.5 (2.9, 4.1) | 7.1 (5.1, 9.0)  | 3.7 (2.2, 5.3) | 3.4 (2.0, 4.8) | 1.7 (0.7, 2.7) | 1.6 (0.7, 2.6) | 5.5 (3.4, 7.6)   | Metropolitan |
| Women  | Incheon     | Namdong-gu   | 5.0 (4.2, 5.7) | 7.5 (5.5, 9.5)  | 5.5 (3.7, 7.2) | 4.3 (2.8, 5.7) | 4.4 (2.8, 5.9) | 3.2 (1.9, 4.5) | 4.3 (2.0, 6.6)   | Metropolitan |
| Women  | Incheon     | Bupyeong-gu  | 4.5 (3.8, 5.2) | 7.1 (5.1, 9.1)  | 4.1 (2.6, 5.6) | 4.1 (2.6, 5.6) | 3.2 (1.9, 4.6) | 3.8 (2.4, 5.2) | 3.3 (0.9, 5.7)   | Metropolitan |
| Women  | Incheon     | Gyeyang-gu   | 3.8 (3.2, 4.4) | 5.5 (3.8, 7.3)  | 3.8 (2.4, 5.2) | 4.2 (2.8, 5.7) | 1.9 (0.9, 2.9) | 3.5 (2.1, 4.9) | 2.0 (-0.2, 4.2)  | Metropolitan |
| Women  | Incheon     | Seo-gu       | 4.0 (3.4, 4.7) | 5.2 (3.5, 7.0)  | 3.6 (2.2, 5.0) | 3.4 (2.1, 4.8) | 4.1 (2.6, 5.7) | 3.7 (2.2, 5.2) | 1.5 (-0.7, 3.7)  | Metropolitan |
| Women  | Incheon     | Ganghwa-gun  | 2.8 (2.2, 3.5) | 3.5 (1.8, 5.1)  | 4.9 (3.0, 6.8) | 1.9 (0.8, 3.1) | 1.5 (0.5, 2.6) | 2.1 (0.8, 3.4) | 1.4 (-0.3, 3.1)  | Rural        |
| Women  | Incheon     | Ongjin-gun   | 3.0 (2.3, 3.7) | 3.6 (1.9, 5.4)  | 1.9 (0.8, 3.1) | 2.6 (1.2, 4.0) | 2.0 (0.8, 3.2) | 5.0 (3.0, 7.0) | -1.4 (-3.8, 1.0) | Rural        |
| Women  | Gwangju     | Dong-gu      | 2.1 (1.6, 2.6) | 3.8 (2.3, 5.3)  | 2.5 (1.4, 3.7) | 1.7 (0.7, 2.6) | 1.3 (0.4, 2.2) | 1.2 (0.4, 2.1) | 2.6 (0.9, 4.3)   | Metropolitan |
| Women  | Gwangju     | Seo-gu       | 2.0 (1.5, 2.4) | 4.3 (2.7, 5.9)  | 1.1 (0.3, 1.9) | 1.7 (0.7, 2.7) | 1.6 (0.6, 2.5) | 1.3 (0.5, 2.1) | 3.0 (1.3, 4.7)   | Metropolitan |
| Women  | Gwangju     | Nam-gu       | 1.7 (1.3, 2.1) | 3.1 (1.7, 4.4)  | 2.3 (1.2, 3.4) | 0.8 (0.2, 1.4) | 1.7 (0.7, 2.7) | 0.7 (0.1, 1.3) | 2.4 (1.0, 3.8)   | Metropolitan |
| Women  | Gwangju     | Buk-gu       | 2.2 (1.7, 2.6) | 4.0 (2.5, 5.5)  | 2.8 (1.5, 4.0) | 1.1 (0.4, 1.9) | 1.8 (0.9, 2.8) | 1.2 (0.4, 2.0) | 2.8 (1.1, 4.5)   | Metropolitan |
| Women  | Gwangju     | Gwangsan-gu  | 2.5 (1.9, 3.0) | 4.7 (3.0, 6.4)  | 3.3 (1.9, 4.7) | 1.7 (0.7, 2.7) | 1.4 (0.5, 2.3) | 1.3 (0.5, 2.2) | 3.4 (1.6, 5.2)   | Metropolitan |
| Women  | Daejeon     | Dong-gu      | 3.7 (3.1, 4.4) | 7.0 (4.9, 9.2)  | 4.5 (2.9, 6.1) | 3.4 (2.0, 4.8) | 2.0 (1.0, 3.0) | 2.0 (0.9, 3.0) | 5.0 (2.7, 7.3)   | Metropolitan |
| Women  | Daejeon     | Jung-gu      | 4.0 (3.4, 4.7) | 7.0 (5.0, 9.0)  | 4.0 (2.6, 5.5) | 3.9 (2.5, 5.4) | 3.4 (2.1, 4.8) | 2.1 (1.0, 3.3) | 4.9 (2.7, 7.1)   | Metropolitan |
| Women  | Daejeon     | Seo-gu       | 3.7 (3.1, 4.4) | 6.1 (4.2, 8.0)  | 4.3 (2.7, 5.8) | 2.7 (1.5, 3.9) | 3.2 (1.8, 4.5) | 2.5 (1.3, 3.7) | 3.6 (1.4, 5.8)   | Metropolitan |
| Women  | Daejeon     | Yuseong-gu   | 2.2 (1.7, 2.8) | 3.6 (2.1, 5.1)  | 1.8 (0.7, 2.8) | 1.4 (0.5, 2.4) | 3.1 (1.8, 4.4) | 1.0 (0.2, 1.9) | 2.6 (1.0, 4.2)   | Metropolitan |
| Women  | Daejeon     | Daedeok-gu   | 3.2 (2.6, 3.8) | 3.6 (2.1, 5.0)  | 4.1 (2.6, 5.6) | 3.6 (2.1, 5.1) | 3.0 (1.7, 4.3) | 1.7 (0.7, 2.6) | 1.9 (0.2, 3.6)   | Metropolitan |
| Women  | Ulsan       | Jung-gu      | 3.6 (2.9, 4.2) | 6.5 (4.6, 8.4)  | 4.0 (2.5, 5.5) | 2.7 (1.5, 4.0) | 2.9 (1.6, 4.1) | 1.7 (0.6, 2.7) | 4.8 (2.7, 6.9)   | Metropolitan |
| Women  | Ulsan       | Nam-gu       | 3.6 (2.9, 4.3) | 8.2 (5.8, 10.5) | 2.9 (1.6, 4.3) | 3.2 (1.7, 4.7) | 2.0 (0.8, 3.1) | 2.0 (0.8, 3.2) | 6.2 (3.8, 8.6)   | Metropolitan |
| Women  | Ulsan       | Dong-gu      | 2.6 (2.0, 3.2) | 4.6 (2.8, 6.3)  | 2.1 (1.0, 3.2) | 2.4 (1.1, 3.7) | 1.6 (0.6, 2.6) | 2.5 (1.1, 4.0) | 2.1 (0.1, 4.1)   | Metropolitan |
| Women  | Ulsan       | Buk-gu       | 2.2 (1.6, 2.8) | 3.1 (1.5, 4.7)  | 2.5 (1.3, 3.8) | 1.1 (0.2, 2.0) | 2.2 (0.9, 3.4) | 2.0 (0.8, 3.3) | 1.1 (-0.6, 2.8)  | Metropolitan |
| Women  | Ulsan       | Ulju-gun     | 2.1 (1.6, 2.6) | 3.9 (2.4, 5.4)  | 2.9 (1.6, 4.2) | 1.8 (0.8, 2.8) | 1.1 (0.4, 1.8) | 1.0 (0.3, 1.8) | 2.9 (1.2, 4.6)   | Rural        |
| Women  | Sejong      | Sejong       | 3.1 (2.2, 4.0) | 5.6 (2.8, 8.3)  | 3.9 (1.7, 6.2) | 3.2 (1.2, 5.3) | 1.5 (0.2, 2.9) | 1.4 (0.0, 3.0) | 4.2 (1.2, 7.2)   | Metropolitan |
| Women  | Gyeonggi-do | Jangan-gu    | 3.2 (2.6, 3.8) | 4.3 (2.8, 5.8)  | 3.7 (2.3, 5.2) | 3.4 (2.0, 4.8) | 2.5 (1.3, 3.7) | 2.0 (0.9, 3.1) | 2.3 (0.5, 4.1)   | Metropolitan |
| Women  | Gyeonggi-do | Gwonseon-gu  | 4.9 (4.1, 5.6) | 8.7 (6.4, 10.9) | 4.6 (3.0, 6.3) | 4.4 (2.8, 6.0) | 2.8 (1.6, 4.0) | 4.0 (2.5, 5.5) | 4.7 (2.1, 7.3)   | Metropolitan |

(Continued to the next page)

Supplemental Table 3. Continued from the previous page

| Gender | Provinces   | Districts       | Overall        | Q1 (lowest)       | Q2              | Q3             | Q4             | Q5 (highest)   | Q1-Q5           | Urbanity     |
|--------|-------------|-----------------|----------------|-------------------|-----------------|----------------|----------------|----------------|-----------------|--------------|
| Women  | Gyeonggi-do | Paldal-gu       | 5.0 (4.2, 5.7) | 7.1 (5.0, 9.1)    | 6.7 (4.8, 8.6)  | 5.1 (3.4, 6.8) | 3.8 (2.3, 5.2) | 2.3 (1.1, 3.4) | 4.8 (2.5, 7.1)  | Metropolitan |
| Women  | Gyeonggi-do | Yeongtong-gu    | 2.1 (1.6, 2.7) | 3.8 (2.2, 5.4)    | 2.4 (1.2, 3.7)  | 1.1 (0.2, 2.0) | 0.9 (0.2, 1.6) | 2.2 (0.8, 3.6) | 1.6 (-0.2, 3.4) | Metropolitan |
| Women  | Gyeonggi-do | Sujeong-gu      | 4.8 (4.0, 5.5) | 5.7 (3.9, 7.6)    | 7.3 (5.3, 9.3)  | 4.6 (3.0, 6.1) | 3.7 (2.2, 5.2) | 2.5 (1.3, 3.8) | 3.2 (1.1, 5.3)  | Metropolitan |
| Women  | Gyeonggi-do | Jungwon-gu      | 5.6 (4.8, 6.4) | 7.1 (5.1, 9.2)    | 6.8 (4.8, 8.7)  | 4.6 (3.0, 6.2) | 5.2 (3.5, 7.0) | 4.7 (3.0, 6.3) | 2.4 (-0.2, 5.0) | Metropolitan |
| Women  | Gyeonggi-do | Bundang-gu      | 1.2 (0.9, 1.6) | 1.5 (0.6, 2.5)    | 1.8 (0.8, 2.8)  | 1.0 (0.3, 1.8) | 0.4 (0.0, 0.9) | 1.4 (0.5, 2.3) | 0.1 (-1.2, 1.4) | Metropolitan |
| Women  | Gyeonggi-do | Uijeongbu-si    | 4.8 (4.0, 5.5) | 6.3 (4.4, 8.1)    | 4.6 (3.1, 6.2)  | 5.1 (3.5, 6.8) | 3.7 (2.3, 5.1) | 4.1 (2.6, 5.5) | 2.2 (-0.1, 4.5) | Urban        |
| Women  | Gyeonggi-do | Manan-gu        | 4.2 (3.5, 4.9) | 6.3 (4.4, 8.2)    | 5.7 (3.9, 7.4)  | 4.6 (3.0, 6.2) | 2.2 (1.1, 3.3) | 2.5 (1.3, 3.6) | 3.8 (1.6, 6.0)  | Metropolitan |
| Women  | Gyeonggi-do | Dongan-gu       | 2.0 (1.5, 2.4) | 3.1 (1.8, 4.3)    | 2.8 (1.6, 4.1)  | 1.9 (0.9, 2.9) | 1.2 (0.4, 2.0) | 0.8 (0.1, 1.4) | 2.3 (0.9, 3.7)  | Metropolitan |
| Women  | Gyeonggi-do | Wonmi-gu        | 3.5 (2.9, 4.1) | 5.2 (3.4, 7.0)    | 4.5 (2.9, 6.1)  | 3.4 (2.0, 4.7) | 3.0 (1.7, 4.3) | 1.3 (0.4, 2.1) | 3.9 (2.0, 5.8)  | Metropolitan |
| Women  | Gyeonggi-do | Sosa-gu         | 3.2 (2.6, 3.8) | 6.0 (4.1, 7.9)    | 2.8 (1.5, 4.0)  | 2.7 (1.5, 3.9) | 2.9 (1.7, 4.1) | 1.6 (0.7, 2.6) | 4.4 (2.4, 6.4)  | Metropolitan |
| Women  | Gyeonggi-do | Ojeong-gu       | 5.7 (4.9, 6.5) | 6.8 (4.8, 8.8)    | 6.7 (4.9, 8.6)  | 5.8 (4.0, 7.6) | 4.6 (3.0, 6.2) | 4.3 (2.7, 5.9) | 2.5 (0.0, 5.0)  | Metropolitan |
| Women  | Gyeonggi-do | Gwangmyeong-si  | 3.7 (3.0, 4.3) | 5.4 (3.6, 7.3)    | 3.6 (2.2, 5.0)  | 3.3 (2.0, 4.7) | 3.1 (1.8, 4.4) | 3.0 (1.7, 4.4) | 2.4 (0.2, 4.6)  | Urban        |
| Women  | Gyeonggi-do | Pyeongtaek-si   | 5.2 (4.7, 5.7) | 8.1 (6.6, 9.6)    | 5.6 (4.3, 6.8)  | 4.2 (3.1, 5.3) | 4.6 (3.5, 5.8) | 3.5 (2.5, 4.5) | 4.6 (2.8, 6.4)  | Urban        |
| Women  | Gyeonggi-do | Dongducheon-si  | 7.4 (6.5, 8.3) | 13.0 (10.2, 15.8) | 6.7 (4.7, 8.6)  | 7.5 (5.4, 9.6) | 6.5 (4.6, 8.4) | 3.5 (2.1, 5.0) | 9.5 (6.5, 12.5) | Urban        |
| Women  | Gyeonggi-do | Sangnok-gu      | 4.5 (3.8, 5.2) | 8.9 (6.6, 11.2)   | 3.7 (2.3, 5.1)  | 4.5 (3.0, 6.0) | 3.2 (1.9, 4.6) | 2.2 (1.1, 3.4) | 6.7 (4.3, 9.1)  | Metropolitan |
| Women  | Gyeonggi-do | Danwon-gu       | 4.9 (4.1, 5.7) | 8.4 (6.1, 10.8)   | 4.8 (3.1, 6.5)  | 4.4 (2.8, 6.0) | 4.2 (2.6, 5.8) | 3.1 (1.7, 4.4) | 5.3 (2.8, 7.8)  | Metropolitan |
| Women  | Gyeonggi-do | Deogyang-gu     | 4.7 (3.9, 5.4) | 7.9 (5.8, 10.0)   | 6.4 (4.6, 8.2)  | 4.0 (2.5, 5.5) | 2.8 (1.5, 4.1) | 2.1 (1.0, 3.2) | 5.8 (3.5, 8.1)  | Metropolitan |
| Women  | Gyeonggi-do | Ilsandong-gu    | 3.1 (2.5, 3.6) | 6.5 (4.6, 8.5)    | 2.4 (1.2, 3.5)  | 3.0 (1.7, 4.3) | 1.9 (0.9, 2.9) | 1.6 (0.7, 2.6) | 4.9 (2.8, 7.0)  | Metropolitan |
| Women  | Gyeonggi-do | Ilsanseo-gu     | 2.5 (2.0, 3.0) | 4.6 (2.9, 6.2)    | 2.5 (1.3, 3.6)  | 2.2 (1.1, 3.4) | 1.4 (0.5, 2.3) | 1.9 (0.8, 2.9) | 2.7 (0.8, 4.6)  | Metropolitan |
| Women  | Gyeonggi-do | Gwacheon-si     | 1.6 (1.2, 2.1) | 3.3 (2.0, 4.7)    | 2.3 (1.1, 3.5)  | 1.2 (0.4, 2.0) | 0.7 (0.0, 1.3) | 0.6 (0.0, 1.2) | 2.7 (1.2, 4.2)  | Urban        |
| Women  | Gyeonggi-do | Guri-si         | 5.0 (4.2, 5.7) | 8.5 (6.3, 10.7)   | 5.4 (3.7, 7.1)  | 4.8 (3.2, 6.5) | 4.0 (2.5, 5.4) | 2.2 (1.0, 3.3) | 6.3 (3.9, 8.7)  | Urban        |
| Women  | Gyeonggi-do | Namyangju-si    | 4.1 (3.5, 4.8) | 6.5 (4.6, 8.4)    | 3.8 (2.4, 5.3)  | 5.0 (3.4, 6.7) | 2.2 (1.1, 3.3) | 3.1 (1.8, 4.5) | 3.4 (1.1, 5.7)  | Urban        |
| Women  | Gyeonggi-do | Osan-si         | 5.1 (4.4, 5.9) | 5.3 (3.6, 7.1)    | 8.0 (5.8, 10.2) | 5.6 (3.8, 7.4) | 4.3 (2.6, 5.9) | 2.4 (1.2, 3.6) | 2.9 (0.8, 5.0)  | Urban        |
| Women  | Gyeonggi-do | Siheung-si      | 4.8 (4.0, 5.6) | 7.7 (5.5, 9.9)    | 5.5 (3.8, 7.3)  | 3.8 (2.3, 5.3) | 4.1 (2.6, 5.5) | 3.2 (1.8, 4.6) | 4.5 (2.0, 7.0)  | Urban        |
| Women  | Gyeonggi-do | Gunpo-si        | 3.3 (2.7, 3.9) | 5.9 (4.1, 7.7)    | 4.5 (3.0, 6.0)  | 2.2 (1.1, 3.3) | 2.2 (1.1, 3.4) | 1.4 (0.6, 2.3) | 4.5 (2.5, 6.5)  | Urban        |
| Women  | Gyeonggi-do | Uiwang-si       | 2.7 (2.2, 3.3) | 4.7 (3.0, 6.4)    | 3.5 (2.1, 4.9)  | 2.5 (1.3, 3.7) | 1.3 (0.4, 2.2) | 1.7 (0.8, 2.7) | 3.0 (1.1, 4.9)  | Urban        |
| Women  | Gyeonggi-do | Hanam-si        | 2.9 (2.4, 3.5) | 5.3 (3.6, 7.1)    | 3.7 (2.3, 5.2)  | 2.6 (1.4, 3.8) | 1.8 (0.9, 2.8) | 1.3 (0.4, 2.1) | 4.0 (2.1, 5.9)  | Urban        |
| Women  | Gyeonggi-do | Cheoin-gu       | 4.2 (3.5, 4.9) | 6.4 (4.5, 8.3)    | 5.0 (3.3, 6.7)  | 4.4 (2.8, 5.9) | 2.7 (1.5, 4.0) | 2.6 (1.4, 3.8) | 3.8 (1.6, 6.0)  | Metropolitan |
| Women  | Gyeonggi-do | Giheung-gu      | 2.7 (2.2, 3.3) | 4.9 (3.1, 6.6)    | 2.6 (1.4, 3.8)  | 1.9 (0.8, 2.9) | 1.8 (0.7, 2.9) | 2.7 (1.4, 3.9) | 2.2 (0.2, 4.2)  | Metropolitan |
| Women  | Gyeonggi-do | Suji-gu         | 2.0 (1.5, 2.4) | 3.4 (2.0, 4.8)    | 2.6 (1.4, 3.8)  | 1.3 (0.5, 2.2) | 1.0 (0.3, 1.8) | 1.3 (0.5, 2.2) | 2.1 (0.5, 3.7)  | Metropolitan |
| Women  | Gyeonggi-do | Paju-si         | 4.9 (4.2, 5.6) | 9.3 (7.0, 11.6)   | 4.1 (2.6, 5.6)  | 3.4 (2.0, 4.8) | 4.6 (3.1, 6.2) | 3.1 (1.8, 4.5) | 6.2 (3.6, 8.8)  | Urban        |
| Women  | Gyeonggi-do | Icheon-si       | 4.6 (3.9, 5.3) | 6.7 (4.8, 8.7)    | 4.5 (2.9, 6.1)  | 3.6 (2.2, 5.0) | 4.3 (2.7, 5.8) | 3.9 (2.4, 5.4) | 2.8 (0.4, 5.2)  | Urban        |
| Women  | Gyeonggi-do | Anseong-si      | 4.7 (4.0, 5.4) | 7.0 (5.0, 9.0)    | 4.6 (3.1, 6.2)  | 5.2 (3.5, 6.9) | 3.1 (1.8, 4.4) | 3.4 (2.0, 4.8) | 3.6 (1.3, 5.9)  | Urban        |
| Women  | Gyeonggi-do | Gimpo-si        | 3.0 (2.4, 3.6) | 3.9 (2.4, 5.4)    | 5.2 (3.5, 6.9)  | 2.1 (1.0, 3.2) | 2.1 (1.0, 3.2) | 1.6 (0.6, 2.5) | 2.3 (0.5, 4.1)  | Urban        |
| Women  | Gyeonggi-do | Hwaseong-si     | 3.1 (2.5, 3.7) | 4.8 (3.1, 6.5)    | 3.0 (1.7, 4.4)  | 2.9 (1.6, 4.2) | 3.2 (1.8, 4.5) | 1.4 (0.5, 2.3) | 3.4 (1.6, 5.2)  | Urban        |
| Women  | Gyeonggi-do | Gwangju-si      | 3.1 (2.5, 3.7) | 5.1 (3.3, 6.8)    | 3.4 (2.1, 4.8)  | 2.2 (1.1, 3.3) | 2.0 (1.0, 3.1) | 3.1 (1.7, 4.4) | 2.0 (-0.2, 4.2) | Urban        |
| Women  | Gyeonggi-do | Yangju-si       | 4.5 (3.8, 5.2) | 5.4 (3.6, 7.1)    | 4.1 (2.6, 5.7)  | 5.9 (4.1, 7.7) | 3.7 (2.3, 5.2) | 3.4 (1.9, 4.8) | 2.0 (-0.2, 4.2) | Urban        |
| Women  | Gyeonggi-do | Pocheon-si      | 5.5 (4.7, 6.3) | 7.3 (5.2, 9.4)    | 5.9 (4.1, 7.8)  | 3.9 (2.4, 5.4) | 4.6 (3.0, 6.1) | 5.9 (4.0, 7.8) | 1.4 (-1.3, 4.1) | Urban        |
| Women  | Gyeonggi-do | Yeoju-gun       | 3.9 (3.2, 4.6) | 5.8 (3.9, 7.8)    | 3.5 (2.1, 4.9)  | 3.3 (2.0, 4.7) | 4.1 (2.6, 5.6) | 2.9 (1.5, 4.3) | 2.9 (0.7, 5.1)  | Urban        |
| Women  | Gyeonggi-do | Yeoncheon-gun   | 4.2 (3.5, 4.9) | 7.8 (5.5, 10.0)   | 4.2 (2.6, 5.9)  | 4.1 (2.5, 5.6) | 3.1 (1.8, 4.5) | 1.9 (0.8, 2.9) | 5.9 (3.6, 8.2)  | Rural        |
| Women  | Gyeonggi-do | Gapyeong-gun    | 3.7 (3.1, 4.4) | 6.3 (4.3, 8.3)    | 4.9 (3.1, 6.6)  | 2.3 (1.2, 3.5) | 2.5 (1.2, 3.8) | 2.7 (1.5, 4.0) | 3.6 (1.3, 5.9)  | Rural        |
| Women  | Gyeonggi-do | Yangpyeong-gun  | 3.7 (3.0, 4.3) | 4.1 (2.5, 5.6)    | 3.9 (2.4, 5.4)  | 3.3 (1.9, 4.8) | 3.7 (2.1, 5.2) | 3.3 (1.8, 4.9) | 0.8 (-1.2, 2.8) | Rural        |
| Women  | Gangwon-do  | Chuncheon-si    | 3.4 (2.7, 4.0) | 7.3 (5.1, 9.4)    | 3.9 (2.4, 5.4)  | 2.5 (1.4, 3.6) | 1.8 (0.8, 2.9) | 1.6 (0.7, 2.6) | 5.7 (3.5, 7.9)  | Urban        |
| Women  | Gangwon-do  | Wonju-si        | 4.7 (3.9, 5.4) | 8.8 (6.5, 11.2)   | 4.9 (3.2, 6.5)  | 3.8 (2.3, 5.2) | 3.8 (2.4, 5.3) | 2.2 (1.1, 3.3) | 6.6 (4.1, 9.1)  | Urban        |
| Women  | Gangwon-do  | Gangneung-si    | 2.7 (2.1, 3.3) | 5.4 (3.5, 7.3)    | 2.4 (1.2, 3.6)  | 2.6 (1.3, 3.8) | 2.3 (1.1, 3.4) | 1.1 (0.3, 2.0) | 4.3 (2.4, 6.2)  | Urban        |
| Women  | Gangwon-do  | Donghae-si      | 3.5 (2.9, 4.2) | 5.2 (3.4, 7.0)    | 4.2 (2.6, 5.7)  | 3.5 (2.0, 4.9) | 2.9 (1.6, 4.2) | 2.0 (0.9, 3.1) | 3.2 (1.2, 5.2)  | Urban        |
| Women  | Gangwon-do  | Taebaek-si      | 4.4 (3.7, 5.1) | 7.6 (5.4, 9.8)    | 4.2 (2.6, 5.7)  | 2.4 (1.3, 3.6) | 2.9 (1.6, 4.2) | 4.9 (3.2, 6.7) | 2.7 (0.0, 5.4)  | Urban        |
| Women  | Gangwon-do  | Sokcho-si       | 5.0 (4.2, 5.7) | 8.5 (6.3, 10.8)   | 6.6 (4.6, 8.5)  | 2.7 (1.5, 4.0) | 3.1 (1.8, 4.4) | 3.8 (2.3, 5.4) | 4.7 (2.1, 7.3)  | Urban        |
| Women  | Gangwon-do  | Samcheok-si     | 2.6 (2.0, 3.2) | 4.3 (2.5, 6.1)    | 4.1 (2.4, 5.8)  | 2.5 (1.2, 3.7) | 1.7 (0.6, 2.8) | 0.6 (0.0, 1.2) | 3.7 (2.0, 5.4)  | Urban        |
| Women  | Gangwon-do  | Hongcheon-gun   | 3.1 (2.4, 3.7) | 5.2 (3.4, 7.1)    | 2.6 (1.3, 3.9)  | 2.0 (0.9, 3.1) | 2.7 (1.4, 4.1) | 3.1 (1.7, 4.4) | 2.1 (-0.1, 4.3) | Rural        |
| Women  | Gangwon-do  | Hoengseong-gun  | 3.0 (2.3, 3.6) | 5.6 (3.5, 7.7)    | 2.7 (1.3, 4.2)  | 3.1 (1.6, 4.5) | 1.9 (0.8, 3.1) | 1.5 (0.6, 2.5) | 4.1 (2.1, 6.1)  | Rural        |
| Women  | Gangwon-do  | Yeongwol-gun    | 3.7 (2.9, 4.4) | 5.8 (3.7, 7.8)    | 3.6 (2.0, 5.3)  | 4.4 (2.6, 6.2) | 2.3 (0.8, 3.7) | 2.1 (0.9, 3.3) | 3.7 (1.6, 5.8)  | Rural        |
| Women  | Gangwon-do  | Pyeongchang-gun | 2.4 (1.8, 2.9) | 3.5 (1.9, 5.0)    | 2.7 (1.4, 4.0)  | 2.9 (1.5, 4.3) | 0.8 (0.2, 1.3) | 2.1 (0.9, 3.3) | 1.4 (-0.4, 3.2) | Rural        |
| Women  | Gangwon-do  | Jeongseon-gun   | 3.1 (2.4, 3.7) | 5.4 (3.5, 7.4)    | 2.9 (1.6, 4.2)  | 2.7 (1.3, 4.1) | 1.7 (0.6, 2.7) | 2.7 (1.4, 4.1) | 2.7 (0.5, 4.9)  | Rural        |
| Women  | Gangwon-do  | Cheorwon-gun    | 3.1 (2.5, 3.7) | 6.0 (4.0, 7.9)    | 2.7 (1.5, 3.9)  | 3.4 (1.9, 4.8) | 1.7 (0.7, 2.7) | 1.8 (0.7, 2.9) | 4.2 (2.0, 6.4)  | Rural        |
| Women  | Gangwon-do  | Hwacheon-gun    | 2.6 (2.0, 3.1) | 1.7 (0.7, 2.8)    | 2.9 (1.4, 4.3)  | 3.7 (2.2, 5.3) | 3.2 (1.7, 4.6) | 1.2 (0.4, 2.0) | 0.5 (-0.9, 1.9) | Rural        |

(Continued to the next page)

Supplemental Table 3. Continued from the previous page

| Gender | Provinces         | Districts       | Overall        | Q1 (lowest)    | Q2             | Q3             | Q4             | Q5 (highest)   | Q1-Q5            | Urbanity     |
|--------|-------------------|-----------------|----------------|----------------|----------------|----------------|----------------|----------------|------------------|--------------|
| Women  | Gangwon-do        | Yanggu-gun      | 2.5 (2.0, 3.1) | 4.6 (2.9, 6.3) | 3.3 (1.9, 4.7) | 1.4 (0.4, 2.3) | 1.5 (0.6, 2.5) | 1.9 (0.8, 3.0) | 2.7 (0.7, 4.7)   | Rural        |
| Women  | Gangwon-do        | Inje-gun        | 2.1 (1.6, 2.6) | 3.3 (1.8, 4.7) | 2.7 (1.4, 4.1) | 1.3 (0.5, 2.1) | 1.5 (0.6, 2.5) | 1.5 (0.6, 2.4) | 1.8 (0.1, 3.5)   | Rural        |
| Women  | Gangwon-do        | Goseong-gun     | 2.4 (1.8, 3.0) | 3.8 (2.3, 5.4) | 3.5 (1.8, 5.3) | 1.1 (0.3, 1.9) | 1.1 (0.2, 2.0) | 2.5 (1.1, 4.0) | 1.3 (-0.6, 3.2)  | Rural        |
| Women  | Gangwon-do        | Yangyang-gun    | 2.8 (2.2, 3.5) | 4.9 (3.1, 6.8) | 3.0 (1.5, 4.6) | 3.1 (1.6, 4.7) | 2.0 (0.8, 3.2) | 0.9 (0.0, 1.8) | 4.0 (2.2, 5.8)   | Rural        |
| Women  | Chungcheongbuk-do | Cheongju-si     | 3.1 (2.8, 3.4) | 4.5 (3.6, 5.4) | 4.3 (3.4, 5.2) | 3.2 (2.4, 4.0) | 2.0 (1.4, 2.7) | 1.5 (1.0, 2.1) | 3.0 (2.0, 4.0)   | Metropolitan |
| Women  | Chungcheongbuk-do | Chungju-si      | 4.5 (3.8, 5.2) | 6.6 (4.6, 8.6) | 7.1 (5.1, 9.1) | 4.3 (2.7, 5.8) | 2.4 (1.3, 3.5) | 2.2 (1.1, 3.3) | 4.4 (2.2, 6.6)   | Urban        |
| Women  | Chungcheongbuk-do | Jecheon-si      | 3.2 (2.6, 3.8) | 5.7 (3.9, 7.6) | 2.6 (1.4, 3.8) | 2.7 (1.4, 3.9) | 2.5 (1.4, 3.7) | 2.2 (1.0, 3.3) | 3.5 (1.4, 5.6)   | Urban        |
| Women  | Chungcheongbuk-do | Boeun-gun       | 2.7 (2.0, 3.4) | 3.4 (1.7, 5.0) | 4.9 (2.9, 7.0) | 2.2 (0.9, 3.5) | 1.7 (0.5, 2.9) | 1.3 (0.2, 2.4) | 2.1 (0.4, 3.8)   | Rural        |
| Women  | Chungcheongbuk-do | Okcheon-gun     | 3.2 (2.6, 3.8) | 3.4 (2.1, 4.7) | 4.6 (3.0, 6.2) | 3.8 (2.3, 5.4) | 2.4 (1.2, 3.6) | 1.7 (0.8, 2.7) | 1.7 (0.0, 3.4)   | Rural        |
| Women  | Chungcheongbuk-do | Yeongdong-gun   | 2.6 (2.0, 3.1) | 3.4 (1.9, 4.8) | 3.8 (2.3, 5.4) | 2.6 (1.3, 3.9) | 1.7 (0.7, 2.7) | 1.4 (0.6, 2.3) | 2.0 (0.4, 3.6)   | Rural        |
| Women  | Chungcheongbuk-do | Jincheon-gun    | 4.2 (3.5, 4.9) | 6.3 (4.3, 8.2) | 3.2 (1.8, 4.6) | 4.0 (2.5, 5.6) | 3.7 (2.3, 5.1) | 3.9 (2.4, 5.5) | 2.4 (0.0, 4.8)   | Rural        |
| Women  | Chungcheongbuk-do | Goesan-gun      | 3.1 (2.5, 3.8) | 3.4 (1.9, 4.9) | 4.6 (2.6, 6.6) | 2.7 (1.3, 4.1) | 2.6 (1.4, 3.7) | 2.5 (1.1, 3.8) | 0.9 (-0.9, 2.7)  | Rural        |
| Women  | Chungcheongbuk-do | Eumseong-gun    | 4.6 (3.8, 5.3) | 5.8 (3.9, 7.8) | 4.9 (3.2, 6.6) | 4.7 (3.0, 6.5) | 3.9 (2.4, 5.4) | 3.5 (2.0, 5.0) | 2.3 (0.0, 4.6)   | Rural        |
| Women  | Chungcheongbuk-do | Danyang-gun     | 2.5 (1.9, 3.0) | 4.1 (2.5, 5.6) | 2.9 (1.6, 4.2) | 1.4 (0.6, 2.2) | 2.1 (0.9, 3.2) | 1.9 (0.8, 2.9) | 2.2 (0.3, 4.1)   | Rural        |
| Women  | Chungcheongbuk-do | Jeungpyeong-gun | 4.6 (3.8, 5.3) | 7.2 (5.1, 9.2) | 5.5 (3.7, 7.3) | 4.5 (2.9, 6.1) | 3.4 (2.0, 4.8) | 2.3 (1.2, 3.4) | 4.9 (2.6, 7.2)   | Rural        |
| Women  | Chungcheongnam-do | Cheonan-si      | 4.0 (3.3, 4.7) | 5.2 (3.5, 7.0) | 5.2 (3.5, 6.9) | 4.1 (2.6, 5.6) | 2.9 (1.6, 4.1) | 2.7 (1.5, 4.0) | 2.5 (0.4, 4.6)   | Metropolitan |
| Women  | Chungcheongnam-do | Gongju-si       | 2.9 (2.3, 3.5) | 4.4 (2.8, 6.1) | 1.7 (0.7, 2.6) | 2.1 (1.0, 3.2) | 3.6 (2.1, 5.0) | 2.7 (1.4, 4.0) | 1.7 (-0.3, 3.7)  | Urban        |
| Women  | Chungcheongnam-do | Boryeong-si     | 3.6 (3.0, 4.3) | 6.7 (4.5, 8.8) | 3.3 (1.8, 4.8) | 2.9 (1.6, 4.2) | 3.4 (1.9, 4.8) | 2.1 (1.1, 3.1) | 4.6 (2.4, 6.8)   | Urban        |
| Women  | Chungcheongnam-do | Asan-si         | 3.5 (2.9, 4.2) | 6.3 (4.3, 8.3) | 3.0 (1.6, 4.3) | 3.2 (1.8, 4.6) | 3.0 (1.6, 4.4) | 2.2 (1.1, 3.3) | 4.1 (1.9, 6.3)   | Urban        |
| Women  | Chungcheongnam-do | Seosan-si       | 2.8 (2.2, 3.4) | 4.1 (2.5, 5.7) | 3.6 (2.1, 5.0) | 1.8 (0.8, 2.8) | 2.9 (1.6, 4.3) | 1.6 (0.7, 2.5) | 2.5 (0.7, 4.3)   | Urban        |
| Women  | Chungcheongnam-do | Nonsan-si       | 3.2 (2.6, 3.8) | 6.3 (4.2, 8.4) | 3.5 (2.1, 4.9) | 1.6 (0.7, 2.6) | 3.2 (1.9, 4.6) | 1.3 (0.6, 2.1) | 5.0 (2.9, 7.1)   | Urban        |
| Women  | Chungcheongnam-do | Gyeryong-si     | 1.6 (1.2, 2.1) | 3.6 (2.1, 5.0) | 1.1 (0.2, 1.9) | 1.3 (0.3, 2.2) | 0.8 (0.1, 1.5) | 1.6 (0.6, 2.5) | 2.0 (0.3, 3.7)   | Urban        |
| Women  | Chungcheongnam-do | Geumsan-gun     | 2.8 (2.2, 3.4) | 3.7 (2.1, 5.3) | 2.7 (1.5, 4.0) | 2.9 (1.6, 4.3) | 2.5 (1.3, 3.6) | 2.3 (1.1, 3.4) | 1.4 (-0.4, 3.2)  | Rural        |
| Women  | Chungcheongnam-do | Buyeo-gun       | 1.9 (1.4, 2.4) | 2.8 (1.4, 4.3) | 1.6 (0.7, 2.4) | 2.6 (1.2, 4.1) | 0.9 (0.2, 1.6) | 1.5 (0.4, 2.6) | 1.3 (-0.3, 2.9)  | Rural        |
| Women  | Chungcheongnam-do | Seocheon-gun    | 1.6 (1.1, 2.0) | 2.3 (1.0, 3.6) | 2.1 (1.0, 3.2) | 1.2 (0.5, 1.9) | 0.9 (0.1, 1.7) | 1.5 (0.4, 2.7) | 0.8 (-0.7, 2.3)  | Rural        |
| Women  | Chungcheongnam-do | Cheongyang-gun  | 1.6 (1.2, 2.0) | 2.7 (1.3, 4.0) | 1.5 (0.6, 2.5) | 1.4 (0.6, 2.2) | 1.2 (0.3, 2.0) | 1.2 (0.4, 2.1) | 1.5 (0.0, 3.0)   | Rural        |
| Women  | Chungcheongnam-do | Hongseong-gun   | 3.4 (2.8, 4.1) | 6.7 (4.5, 8.8) | 4.0 (2.4, 5.6) | 2.7 (1.5, 4.0) | 2.6 (1.4, 3.8) | 1.2 (0.4, 2.0) | 5.5 (3.4, 7.6)   | Rural        |
| Women  | Chungcheongnam-do | Yesan-gun       | 3.3 (2.6, 3.9) | 4.5 (2.8, 6.3) | 3.0 (1.7, 4.3) | 3.8 (2.2, 5.4) | 2.7 (1.3, 4.2) | 2.2 (0.9, 3.6) | 2.3 (0.3, 4.3)   | Rural        |
| Women  | Chungcheongnam-do | Taean-gun       | 2.5 (1.9, 3.1) | 3.8 (2.1, 5.6) | 3.0 (1.5, 4.5) | 1.6 (0.6, 2.7) | 2.4 (1.1, 3.6) | 1.8 (0.6, 2.9) | 2.0 (0.2, 3.8)   | Rural        |
| Women  | Chungcheongnam-do | Dangjin-si      | 3.8 (3.1, 4.5) | 5.7 (3.8, 7.5) | 2.6 (1.4, 3.8) | 3.8 (2.3, 5.4) | 2.3 (1.2, 3.5) | 4.7 (3.0, 6.5) | 1.0 (-1.4, 3.4)  | Urban        |
| Women  | Jeollabuk-do      | Jeonju-si       | 2.1 (1.6, 2.6) | 4.6 (3.0, 6.2) | 3.1 (1.9, 4.4) | 1.1 (0.3, 1.8) | 1.1 (0.4, 1.9) | 0.8 (0.1, 1.5) | 3.8 (2.1, 5.5)   | Metropolitan |
| Women  | Jeollabuk-do      | Gunsan-si       | 2.9 (2.3, 3.5) | 5.8 (3.9, 7.7) | 1.9 (0.8, 2.9) | 1.7 (0.7, 2.6) | 2.6 (1.4, 3.8) | 2.8 (1.5, 4.1) | 3.0 (0.8, 5.2)   | Urban        |
| Women  | Jeollabuk-do      | Iksan-si        | 1.8 (1.4, 2.3) | 3.9 (2.5, 5.3) | 2.2 (1.1, 3.3) | 1.5 (0.6, 2.4) | 0.5 (0.0, 1.0) | 1.0 (0.2, 1.7) | 2.9 (1.3, 4.5)   | Urban        |
| Women  | Jeollabuk-do      | Jeongeup-si     | 2.3 (1.8, 2.9) | 2.8 (1.5, 4.1) | 2.4 (1.2, 3.6) | 3.2 (1.7, 4.7) | 1.8 (0.7, 2.8) | 1.7 (0.6, 2.7) | 1.1 (-0.5, 2.7)  | Urban        |
| Women  | Jeollabuk-do      | Namwon-si       | 2.4 (1.9, 3.0) | 4.0 (2.4, 5.5) | 2.2 (1.1, 3.2) | 1.6 (0.6, 2.6) | 2.8 (1.6, 4.1) | 1.5 (0.7, 2.4) | 2.5 (0.8, 4.2)   | Urban        |
| Women  | Jeollabuk-do      | Gimje-si        | 1.5 (1.1, 2.0) | 1.9 (0.7, 3.1) | 1.1 (0.2, 1.9) | 2.5 (1.2, 3.8) | 1.7 (0.6, 2.7) | 0.5 (0.1, 0.8) | 1.4 (0.2, 2.6)   | Urban        |
| Women  | Jeollabuk-do      | Wanju-gun       | 1.9 (1.4, 2.3) | 3.7 (2.3, 5.2) | 2.5 (1.3, 3.7) | 1.3 (0.5, 2.1) | 1.2 (0.4, 2.1) | 0.7 (0.1, 1.4) | 3.0 (1.4, 4.6)   | Rural        |
| Women  | Jeollabuk-do      | Jinan-gun       | 1.4 (1.0, 1.9) | 2.4 (1.0, 3.7) | 1.7 (0.7, 2.7) | 1.0 (0.4, 1.6) | 0.8 (0.1, 1.5) | 1.4 (0.5, 2.4) | 1.0 (-0.5, 2.5)  | Rural        |
| Women  | Jeollabuk-do      | Muju-gun        | 2.0 (1.5, 2.5) | 3.6 (1.9, 5.3) | 2.1 (1.0, 3.3) | 2.0 (0.8, 3.2) | 1.1 (0.5, 1.7) | 1.1 (0.2, 2.0) | 2.5 (0.9, 4.1)   | Rural        |
| Women  | Jeollabuk-do      | Jangsu-gun      | 2.0 (1.5, 2.5) | 3.1 (1.6, 4.6) | 0.7 (0.3, 1.2) | 2.8 (1.3, 4.2) | 2.2 (0.8, 3.6) | 1.1 (0.5, 1.8) | 2.0 (0.4, 3.6)   | Rural        |
| Women  | Jeollabuk-do      | Imsil-gun       | 1.1 (0.8, 1.4) | 1.5 (0.5, 2.4) | 1.4 (0.5, 2.2) | 0.9 (0.3, 1.6) | 0.8 (0.2, 1.4) | 0.8 (0.3, 1.4) | 0.7 (-0.4, 1.8)  | Rural        |
| Women  | Jeollabuk-do      | Sunchang-gun    | 1.3 (0.9, 1.7) | 2.6 (1.3, 3.9) | 0.8 (0.3, 1.4) | 1.2 (0.3, 2.0) | 0.8 (0.2, 1.3) | 1.2 (0.4, 2.1) | 1.4 (0.0, 2.8)   | Rural        |
| Women  | Jeollabuk-do      | Gochang-gun     | 2.1 (1.6, 2.6) | 3.0 (1.6, 4.3) | 2.0 (0.9, 3.2) | 1.8 (0.8, 2.8) | 1.8 (0.7, 3.0) | 2.0 (0.7, 3.2) | 1.0 (-0.7, 2.7)  | Rural        |
| Women  | Jeollabuk-do      | Buan-gun        | 1.7 (1.3, 2.2) | 4.3 (2.5, 6.2) | 1.7 (0.8, 2.6) | 1.2 (0.4, 2.1) | 1.0 (0.3, 1.6) | 0.7 (0.1, 1.3) | 3.6 (2.0, 5.2)   | Rural        |
| Women  | Jeollanam-do      | Naju-si         | 1.8 (1.3, 2.2) | 2.6 (1.2, 4.0) | 2.2 (1.0, 3.3) | 0.8 (0.1, 1.5) | 1.5 (0.5, 2.5) | 1.8 (0.6, 3.0) | 0.8 (-0.8, 2.4)  | Urban        |
| Women  | Jeollanam-do      | Mokpo-si        | 2.2 (1.7, 2.7) | 4.5 (2.9, 6.1) | 1.9 (0.9, 3.0) | 2.3 (1.2, 3.4) | 1.3 (0.4, 2.1) | 1.0 (0.3, 1.8) | 3.5 (1.8, 5.2)   | Urban        |
| Women  | Jeollanam-do      | Yeosu-si        | 2.2 (1.7, 2.7) | 4.3 (2.7, 5.9) | 1.9 (0.9, 3.0) | 1.5 (0.6, 2.3) | 1.3 (0.5, 2.1) | 1.7 (0.8, 2.7) | 2.6 (0.8, 4.4)   | Urban        |
| Women  | Jeollanam-do      | Suncheon-si     | 1.6 (1.2, 2.1) | 1.9 (0.8, 2.9) | 1.8 (0.8, 2.8) | 2.3 (1.1, 3.4) | 1.4 (0.5, 2.3) | 1.0 (0.2, 1.8) | 0.9 (-0.4, 2.2)  | Urban        |
| Women  | Jeollanam-do      | Gwangyang-si    | 2.1 (1.6, 2.6) | 3.7 (2.2, 5.2) | 2.3 (1.2, 3.4) | 1.7 (0.7, 2.7) | 1.6 (0.7, 2.6) | 1.0 (0.3, 1.8) | 2.7 (1.1, 4.3)   | Urban        |
| Women  | Jeollanam-do      | Damyang-gun     | 1.7 (1.2, 2.1) | 2.0 (0.9, 3.2) | 2.1 (1.0, 3.3) | 1.8 (0.6, 3.1) | 1.3 (0.4, 2.1) | 1.0 (0.4, 1.6) | 1.0 (-0.3, 2.3)  | Rural        |
| Women  | Jeollanam-do      | Gokseong-gun    | 1.5 (1.1, 2.0) | 2.6 (1.2, 4.0) | 1.1 (0.5, 1.7) | 1.1 (0.4, 1.9) | 1.3 (0.4, 2.2) | 1.8 (0.7, 3.0) | 0.8 (-0.8, 2.4)  | Rural        |
| Women  | Jeollanam-do      | Gurye-gun       | 1.1 (0.7, 1.4) | 0.5 (0.1, 0.9) | 1.6 (0.7, 2.6) | 1.5 (0.5, 2.5) | 0.7 (0.2, 1.1) | 1.0 (0.2, 1.8) | -0.5 (-1.4, 0.4) | Rural        |
| Women  | Jeollanam-do      | Goheung-gun     | 0.8 (0.4, 1.2) | 0.6 (0.0, 1.2) | 0.9 (0.0, 1.9) | 0.9 (0.2, 1.6) | 1.3 (0.0, 2.5) | 0.4 (0.0, 1.0) | 0.2 (-0.5, 0.9)  | Rural        |
| Women  | Jeollanam-do      | Boseong-gun     | 1.0 (0.7, 1.4) | 1.8 (0.6, 2.9) | 1.2 (0.4, 2.0) | 0.6 (0.0, 1.2) | 0.5 (0.1, 1.0) | 1.1 (0.2, 2.0) | 0.7 (-0.6, 2.0)  | Rural        |
| Women  | Jeollanam-do      | Hwasun-gun      | 2.2 (1.7, 2.7) | 2.7 (1.5, 4.0) | 2.2 (1.1, 3.3) | 2.5 (1.3, 3.7) | 2.3 (1.2, 3.4) | 1.4 (0.5, 2.2) | 1.3 (-0.2, 2.8)  | Rural        |
| Women  | Jeollanam-do      | Jangheung-gun   | 1.0 (0.6, 1.3) | 2.7 (1.2, 4.2) | 0.8 (0.1, 1.5) | 0.8 (0.1, 1.5) | 0.6 (0.1, 1.1) | 0.2 (0.0, 0.4) | 2.5 (1.2, 3.8)   | Rural        |

(Continued to the next page)



Supplemental Table 3. Continued from the previous page

| Gender | Provinces        | Districts       | Overall        | Q1 (lowest)     | Q2             | Q3             | Q4             | Q5 (highest)   | Q1-Q5            | Urbanity     |
|--------|------------------|-----------------|----------------|-----------------|----------------|----------------|----------------|----------------|------------------|--------------|
| Women  | Jeollanam-do     | Gangjin-gun     | 1.1 (0.7, 1.4) | 1.3 (0.4, 2.3)  | 0.8 (0.0, 1.5) | 1.7 (0.6, 2.7) | 0.9 (0.2, 1.7) | 0.7 (0.0, 1.5) | 0.6 (-0.4, 1.6)  | Rural        |
| Women  | Jeollanam-do     | Haenam-gun      | 1.5 (1.0, 2.0) | 2.7 (1.1, 4.3)  | 1.4 (0.4, 2.3) | 0.5 (0.0, 1.0) | 1.8 (0.7, 3.0) | 1.1 (0.1, 2.2) | 1.6 (0.2, 3.0)   | Rural        |
| Women  | Jeollanam-do     | Yeongam-gun     | 1.4 (0.9, 1.8) | 2.1 (0.9, 3.3)  | 1.5 (0.5, 2.5) | 0.5 (0.0, 1.0) | 1.6 (0.6, 2.7) | 1.0 (0.2, 1.8) | 1.1 (-0.2, 2.4)  | Rural        |
| Women  | Jeollanam-do     | Muan-gun        | 0.8 (0.5, 1.1) | 0.9 (0.1, 1.6)  | 1.8 (0.7, 2.9) | 0.6 (0.0, 1.2) | 0.2 (0.0, 0.4) | 0.5 (0.1, 0.9) | 0.4 (-0.5, 1.3)  | Rural        |
| Women  | Jeollanam-do     | Hampyeong-gun   | 1.8 (1.3, 2.3) | 1.7 (0.6, 2.8)  | 2.0 (0.8, 3.3) | 2.2 (0.8, 3.6) | 2.0 (0.7, 3.2) | 1.0 (0.2, 1.8) | 0.7 (-0.5, 1.9)  | Rural        |
| Women  | Jeollanam-do     | Yeonggwang-gun  | 2.8 (2.1, 3.4) | 4.7 (2.8, 6.7)  | 2.1 (1.0, 3.2) | 3.5 (1.8, 5.1) | 1.4 (0.5, 2.3) | 2.6 (1.2, 4.0) | 2.1 (0.1, 4.1)   | Rural        |
| Women  | Jeollanam-do     | Jangseong-gun   | 1.2 (0.8, 1.6) | 1.0 (0.3, 1.7)  | 2.2 (1.0, 3.5) | 0.9 (0.2, 1.6) | 1.5 (0.6, 2.5) | 0.2 (0.0, 0.5) | 0.8 (0.0, 1.6)   | Rural        |
| Women  | Jeollanam-do     | Wando-gun       | 1.2 (0.8, 1.7) | 2.5 (1.0, 4.0)  | 1.6 (0.5, 2.7) | 0.6 (0.0, 1.3) | 0.4 (0.1, 0.8) | 1.1 (0.1, 2.1) | 1.4 (0.0, 2.8)   | Rural        |
| Women  | Jeollanam-do     | Jindo-gun       | 1.5 (1.0, 1.9) | 2.9 (1.3, 4.5)  | 1.0 (0.2, 1.8) | 1.2 (0.3, 2.1) | 0.9 (0.1, 1.7) | 1.4 (0.3, 2.4) | 1.5 (0.0, 3.0)   | Rural        |
| Women  | Jeollanam-do     | Sinan-gun       | 1.0 (0.5, 1.4) | 0.4 (0.0, 1.0)  | 0.5 (0.0, 1.4) | 1.6 (0.4, 2.8) | 1.6 (0.2, 2.9) | 0.7 (0.0, 1.6) | -0.3 (-1.1, 0.5) | Rural        |
| Women  | Gyeongsangbuk-do | Nam-gu          | 4.0 (3.4, 4.7) | 7.2 (5.2, 9.3)  | 4.0 (2.5, 5.5) | 4.1 (2.6, 5.7) | 3.0 (1.7, 4.3) | 1.7 (0.7, 2.7) | 5.5 (3.3, 7.7)   | Metropolitan |
| Women  | Gyeongsangbuk-do | Buk-gu          | 2.3 (1.8, 2.8) | 4.4 (2.8, 6.0)  | 2.8 (1.5, 4.0) | 2.4 (1.3, 3.5) | 1.5 (0.6, 2.3) | 0.7 (0.1, 1.4) | 3.7 (2.0, 5.4)   | Metropolitan |
| Women  | Gyeongsangbuk-do | Gyeongju-si     | 3.0 (2.4, 3.5) | 3.4 (2.1, 4.7)  | 4.4 (2.8, 5.9) | 2.5 (1.3, 3.6) | 2.1 (1.1, 3.2) | 2.6 (1.5, 3.8) | 0.8 (-1.0, 2.6)  | Urban        |
| Women  | Gyeongsangbuk-do | Gimcheon-si     | 2.9 (2.4, 3.5) | 4.5 (2.9, 6.1)  | 4.4 (2.8, 5.9) | 2.6 (1.4, 3.8) | 1.6 (0.7, 2.5) | 1.6 (0.7, 2.5) | 2.9 (1.1, 4.7)   | Urban        |
| Women  | Gyeongsangbuk-do | Andong-si       | 3.0 (2.5, 3.6) | 7.1 (4.9, 9.3)  | 3.6 (2.2, 5.0) | 2.5 (1.3, 3.7) | 1.2 (0.5, 2.0) | 1.2 (0.4, 1.9) | 5.9 (3.8, 8.0)   | Urban        |
| Women  | Gyeongsangbuk-do | Gumi-si         | 4.4 (3.9, 4.9) | 6.2 (4.7, 7.6)  | 5.9 (4.6, 7.2) | 5.2 (3.9, 6.5) | 2.4 (1.5, 3.2) | 2.7 (1.8, 3.5) | 3.5 (1.9, 5.1)   | Urban        |
| Women  | Gyeongsangbuk-do | Yeongju-si      | 2.7 (2.1, 3.2) | 4.1 (2.4, 5.7)  | 2.9 (1.7, 4.0) | 3.0 (1.6, 4.3) | 2.3 (1.2, 3.4) | 1.2 (0.4, 2.0) | 2.9 (1.2, 4.6)   | Urban        |
| Women  | Gyeongsangbuk-do | Yeongcheon-si   | 3.3 (2.7, 3.9) | 4.2 (2.7, 5.7)  | 3.4 (2.0, 4.7) | 3.9 (2.3, 5.5) | 3.2 (1.8, 4.5) | 1.8 (0.9, 2.7) | 2.4 (0.6, 4.2)   | Urban        |
| Women  | Gyeongsangbuk-do | Sangju-si       | 2.1 (1.6, 2.6) | 4.0 (2.4, 5.6)  | 2.4 (1.4, 3.4) | 1.7 (0.7, 2.8) | 1.2 (0.5, 1.9) | 1.0 (0.3, 1.7) | 3.0 (1.4, 4.6)   | Urban        |
| Women  | Gyeongsangbuk-do | Mungyeong-si    | 2.7 (2.1, 3.2) | 4.1 (2.4, 5.7)  | 2.0 (1.1, 3.0) | 3.3 (1.8, 4.8) | 2.9 (1.6, 4.2) | 1.4 (0.7, 2.1) | 2.7 (0.9, 4.5)   | Urban        |
| Women  | Gyeongsangbuk-do | Gyeongsan-si    | 2.4 (1.9, 2.9) | 3.9 (2.4, 5.4)  | 1.7 (0.7, 2.6) | 1.8 (0.8, 2.8) | 2.0 (0.9, 3.0) | 2.5 (1.3, 3.6) | 1.4 (-0.5, 3.3)  | Urban        |
| Women  | Gyeongsangbuk-do | Gunwi-gun       | 1.3 (0.9, 1.7) | 1.9 (1.0, 2.9)  | 1.7 (0.9, 2.6) | 1.0 (0.3, 1.7) | 1.4 (0.2, 2.5) | 0.7 (0.1, 1.3) | 1.2 (0.0, 2.4)   | Rural        |
| Women  | Gyeongsangbuk-do | Uiseong-gun     | 1.3 (0.9, 1.8) | 3.3 (1.4, 5.2)  | 0.8 (0.3, 1.3) | 1.5 (0.6, 2.4) | 0.7 (0.1, 1.4) | 0.4 (0.0, 0.8) | 2.9 (1.4, 4.4)   | Rural        |
| Women  | Gyeongsangbuk-do | Cheongsong-gun  | 1.8 (1.3, 2.3) | 3.0 (1.6, 4.5)  | 0.9 (0.2, 1.7) | 3.0 (1.3, 4.6) | 1.3 (0.2, 2.3) | 0.9 (0.4, 1.4) | 2.1 (0.6, 3.6)   | Rural        |
| Women  | Gyeongsangbuk-do | Yeongyang-gun   | 1.8 (1.3, 2.3) | 1.8 (0.8, 2.9)  | 3.1 (1.6, 4.7) | 1.3 (0.3, 2.2) | 1.5 (0.3, 2.7) | 1.2 (0.5, 1.9) | 0.6 (-0.7, 1.9)  | Rural        |
| Women  | Gyeongsangbuk-do | Yeongdeok-gun   | 1.7 (1.2, 2.2) | 2.6 (1.2, 4.1)  | 2.4 (1.1, 3.8) | 1.5 (0.4, 2.6) | 1.2 (0.4, 1.9) | 0.8 (0.1, 1.6) | 1.8 (0.5, 3.1)   | Rural        |
| Women  | Gyeongsangbuk-do | Cheongdo-gun    | 2.6 (2.1, 3.2) | 4.6 (3.0, 6.3)  | 2.6 (1.6, 3.7) | 1.7 (0.7, 2.7) | 2.1 (0.9, 3.4) | 2.0 (0.8, 3.1) | 2.6 (0.7, 4.5)   | Rural        |
| Women  | Gyeongsangbuk-do | Goryeong-gun    | 2.3 (1.8, 2.8) | 3.0 (1.6, 4.3)  | 3.2 (1.9, 4.5) | 2.5 (1.3, 3.6) | 2.1 (1.0, 3.2) | 0.8 (0.3, 1.3) | 2.2 (0.7, 3.7)   | Rural        |
| Women  | Gyeongsangbuk-do | Seongju-gun     | 2.8 (2.3, 3.4) | 5.3 (3.5, 7.0)  | 3.1 (1.7, 4.4) | 2.9 (1.7, 4.1) | 1.2 (0.3, 2.0) | 1.6 (0.8, 2.4) | 3.7 (1.8, 5.6)   | Rural        |
| Women  | Gyeongsangbuk-do | Chilgok-gun     | 3.9 (3.2, 4.6) | 4.1 (2.5, 5.6)  | 4.5 (2.9, 6.1) | 4.3 (2.7, 5.8) | 3.3 (1.9, 4.6) | 3.5 (2.1, 4.8) | 0.6 (-1.4, 2.6)  | Rural        |
| Women  | Gyeongsangbuk-do | Yecheon-gun     | 2.3 (1.7, 2.8) | 2.4 (1.1, 3.7)  | 2.7 (1.4, 4.0) | 3.1 (1.6, 4.6) | 1.7 (0.7, 2.7) | 1.5 (0.8, 2.2) | 0.9 (-0.6, 2.4)  | Rural        |
| Women  | Gyeongsangbuk-do | Bonghwa-gun     | 2.0 (1.5, 2.5) | 2.6 (1.3, 3.9)  | 2.0 (1.1, 3.0) | 1.1 (0.2, 2.0) | 2.9 (1.3, 4.6) | 1.2 (0.4, 2.0) | 1.4 (-0.1, 2.9)  | Rural        |
| Women  | Gyeongsangbuk-do | Uljin-gun       | 2.2 (1.7, 2.8) | 2.5 (1.2, 3.7)  | 1.3 (0.4, 2.1) | 2.1 (1.0, 3.2) | 2.0 (0.8, 3.2) | 3.5 (1.8, 5.2) | -1.0 (-2.8, 0.8) | Rural        |
| Women  | Gyeongsangbuk-do | Ulleung-gun     | 2.7 (2.0, 3.3) | 2.3 (1.0, 3.7)  | 3.6 (1.9, 5.2) | 2.9 (1.4, 4.4) | 1.6 (0.5, 2.7) | 3.2 (1.5, 4.9) | -0.9 (-2.8, 1.0) | Rural        |
| Women  | Gyeongsangnam-do | Changwon-si     | 2.6 (2.0, 3.1) | 4.1 (2.5, 5.7)  | 3.9 (2.3, 5.5) | 2.1 (0.9, 3.2) | 2.1 (0.9, 3.2) | 0.7 (0.0, 1.4) | 3.4 (1.8, 5.0)   | Metropolitan |
| Women  | Gyeongsangnam-do | Masan-si        | 3.5 (2.9, 4.1) | 5.3 (3.5, 7.0)  | 4.5 (3.0, 6.1) | 1.9 (0.9, 2.9) | 3.8 (2.4, 5.2) | 1.9 (1.0, 2.9) | 3.4 (1.5, 5.3)   | Metropolitan |
| Women  | Gyeongsangnam-do | Jinju-si        | 3.7 (3.1, 4.4) | 6.5 (4.6, 8.4)  | 5.5 (3.8, 7.2) | 2.0 (1.0, 3.1) | 2.6 (1.5, 3.7) | 2.3 (1.2, 3.3) | 4.2 (2.1, 6.3)   | Urban        |
| Women  | Gyeongsangnam-do | Jinhae-si       | 2.8 (2.2, 3.4) | 5.1 (3.3, 6.8)  | 2.2 (1.1, 3.4) | 2.8 (1.6, 4.1) | 2.3 (1.2, 3.4) | 1.7 (0.7, 2.7) | 3.4 (1.4, 5.4)   | Metropolitan |
| Women  | Gyeongsangnam-do | Tongyeong-si    | 4.2 (3.5, 4.9) | 8.7 (6.5, 11.0) | 3.6 (2.3, 5.0) | 2.9 (1.6, 4.1) | 3.8 (2.4, 5.2) | 2.0 (1.0, 3.0) | 6.7 (4.3, 9.1)   | Urban        |
| Women  | Gyeongsangnam-do | Sacheon-si      | 2.6 (2.0, 3.1) | 3.9 (2.4, 5.4)  | 2.6 (1.4, 3.8) | 2.9 (1.6, 4.2) | 1.8 (0.8, 2.7) | 1.6 (0.8, 2.4) | 2.3 (0.6, 4.0)   | Urban        |
| Women  | Gyeongsangnam-do | Gimhae-si       | 3.0 (2.4, 3.6) | 5.3 (3.6, 7.0)  | 3.0 (1.7, 4.3) | 3.0 (1.7, 4.3) | 2.4 (1.2, 3.6) | 1.3 (0.4, 2.2) | 4.0 (2.1, 5.9)   | Urban        |
| Women  | Gyeongsangnam-do | Miryang-si      | 3.1 (2.5, 3.7) | 5.9 (4.2, 7.6)  | 3.9 (2.4, 5.4) | 1.9 (0.9, 2.9) | 2.1 (1.1, 3.2) | 1.6 (0.7, 2.5) | 4.3 (2.3, 6.3)   | Urban        |
| Women  | Gyeongsangnam-do | Geoje-si        | 3.4 (2.7, 4.0) | 6.3 (4.3, 8.3)  | 3.1 (1.7, 4.5) | 2.4 (1.2, 3.6) | 3.2 (1.7, 4.6) | 2.1 (0.9, 3.2) | 4.2 (2.0, 6.4)   | Urban        |
| Women  | Gyeongsangnam-do | Yongsan-si      | 2.7 (2.1, 3.2) | 4.2 (2.7, 5.7)  | 2.1 (1.0, 3.2) | 3.0 (1.7, 4.3) | 1.8 (0.8, 2.8) | 2.4 (1.2, 3.5) | 1.8 (-0.1, 3.7)  | Urban        |
| Women  | Gyeongsangnam-do | Uiryeong-gun    | 2.5 (1.9, 3.1) | 3.7 (1.9, 5.5)  | 3.4 (1.6, 5.2) | 2.4 (1.2, 3.7) | 1.8 (0.8, 2.7) | 1.3 (0.4, 2.2) | 2.4 (0.8, 4.0)   | Rural        |
| Women  | Gyeongsangnam-do | Haman-gun       | 2.3 (1.8, 2.8) | 4.2 (2.7, 5.7)  | 1.8 (0.9, 2.7) | 1.9 (0.9, 2.9) | 1.9 (0.9, 2.8) | 1.8 (0.9, 2.8) | 2.4 (0.6, 4.2)   | Rural        |
| Women  | Gyeongsangnam-do | Changnyeong-gun | 2.5 (2.0, 3.0) | 3.4 (2.0, 4.7)  | 2.3 (1.3, 3.3) | 2.8 (1.5, 4.0) | 1.9 (1.0, 2.9) | 2.4 (1.3, 3.5) | 1.0 (-0.8, 2.8)  | Rural        |
| Women  | Gyeongsangnam-do | Goseong-gun     | 3.6 (3.0, 4.3) | 6.6 (4.6, 8.6)  | 1.7 (0.9, 2.5) | 4.5 (2.8, 6.2) | 3.3 (1.9, 4.7) | 2.0 (1.1, 2.9) | 4.6 (2.5, 6.7)   | Rural        |
| Women  | Gyeongsangnam-do | Namhae-gun      | 2.1 (1.5, 2.6) | 2.3 (1.2, 3.5)  | 3.1 (1.6, 4.6) | 1.5 (0.7, 2.4) | 1.5 (0.5, 2.5) | 1.7 (0.6, 2.8) | 0.6 (-0.9, 2.1)  | Rural        |
| Women  | Gyeongsangnam-do | Hadong-gun      | 3.0 (2.4, 3.6) | 4.5 (2.7, 6.3)  | 2.8 (1.6, 4.1) | 3.3 (1.9, 4.7) | 1.8 (0.9, 2.7) | 2.4 (1.3, 3.5) | 2.1 (0.2, 4.0)   | Rural        |
| Women  | Gyeongsangnam-do | Sancheong-gun   | 2.6 (2.0, 3.1) | 3.4 (2.0, 4.8)  | 2.8 (1.7, 4.0) | 3.4 (1.8, 4.9) | 1.9 (0.8, 3.1) | 1.4 (0.8, 2.0) | 2.0 (0.4, 3.6)   | Rural        |
| Women  | Gyeongsangnam-do | Hamyang-gun     | 2.0 (1.5, 2.4) | 2.2 (1.1, 3.3)  | 3.1 (1.7, 4.5) | 1.8 (1.0, 2.6) | 1.4 (0.7, 2.1) | 1.3 (0.7, 2.0) | 0.9 (-0.5, 2.3)  | Rural        |
| Women  | Gyeongsangnam-do | Geochang-gun    | 2.6 (2.1, 3.1) | 4.5 (2.8, 6.2)  | 1.8 (0.9, 2.8) | 2.4 (1.3, 3.5) | 2.4 (1.2, 3.5) | 1.9 (0.9, 2.8) | 2.6 (0.8, 4.4)   | Rural        |
| Women  | Gyeongsangnam-do | Hapcheon-gun    | 2.2 (1.7, 2.8) | 2.1 (1.1, 3.1)  | 4.4 (2.6, 6.3) | 2.4 (1.2, 3.7) | 1.4 (0.6, 2.1) | 1.0 (0.5, 1.5) | 1.1 (-0.2, 2.4)  | Rural        |
| Women  | Jeju-do          | Jeju-si         | 3.5 (3.1, 3.9) | 7.2 (5.9, 8.5)  | 4.2 (3.2, 5.2) | 2.7 (1.9, 3.4) | 2.2 (1.5, 2.8) | 1.9 (1.3, 2.5) | 5.3 (4.0, 6.6)   | Urban        |
| Women  | Jeju-do          | Seogwipo-si     | 3.0 (2.6, 3.3) | 4.5 (3.4, 5.5)  | 4.1 (3.1, 5.2) | 2.5 (1.7, 3.2) | 2.3 (1.6, 3.0) | 1.5 (0.9, 2.1) | 3.0 (1.9, 4.1)   | Urban        |

Source from the Community Health Survey in South Korea, 2008-2014.
