# Supplementary material for: Income Differences in Smoking Prevalences in 245 Districts of South Korea: Patterns by Area Deprivation and Urbanity, 2008-2014
Source: PubMed Central journal article supplement — J Prev Med Public Health. 2017 Feb 9;50(2):100–26. doi: 10.3961/jpmph.16.069 (PMC5398336; doi:10.3961/jpmph.16.069), 2017-02-09
Supplement: jpmph-50-2-100-suppl4.pdf [file jpmph-50-2-100-suppl4.pdf]

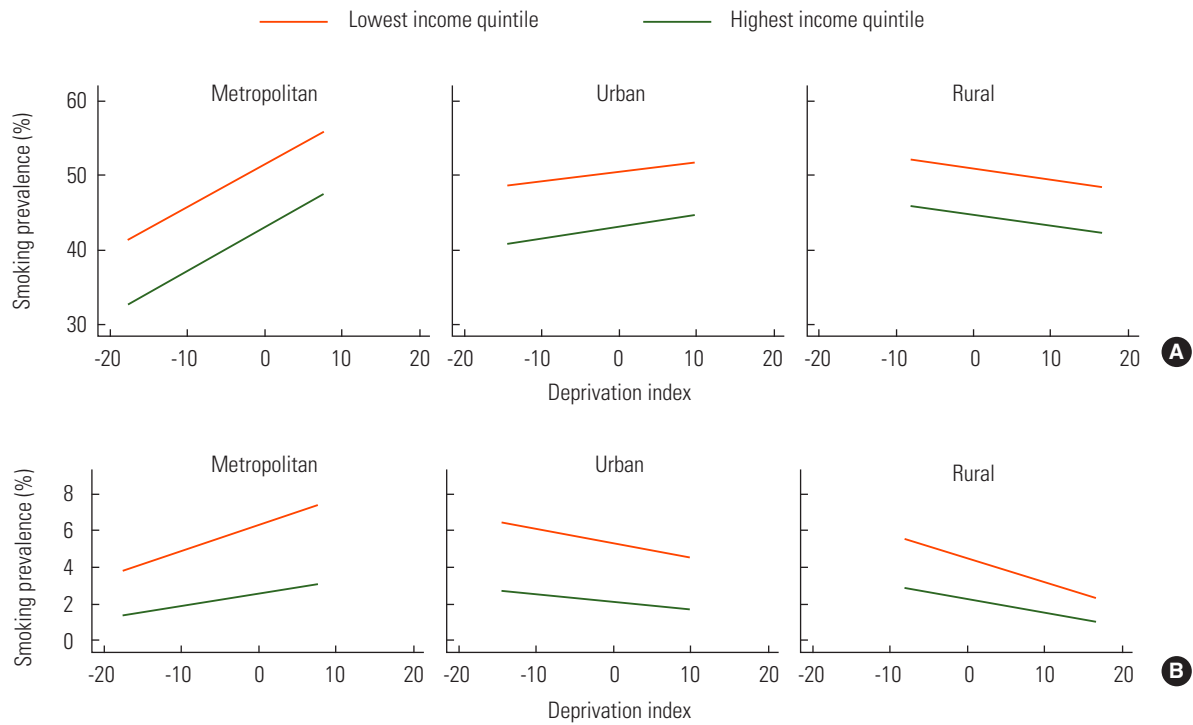

**Supplemental Figure 1.** Linear regression lines for the association of area deprivation index with age-adjusted smoking prevalence in the highest and lowest income quintiles in Korean men (A) and women (B). Source from the Community Health Survey in Korea, 2008-2014.
