# Supplementary material for: Income Differences in Smoking Prevalences in 245 Districts of South Korea: Patterns by Area Deprivation and Urbanity, 2008-2014
Source: PubMed Central journal article supplement — J Prev Med Public Health. 2017 Feb 9;50(2):100–26. doi: 10.3961/jpmph.16.069 (PMC5398336; doi:10.3961/jpmph.16.069), 2017-02-09
Supplement: jpmph-50-2-100-suppl5.pdf [file jpmph-50-2-100-suppl5.pdf]

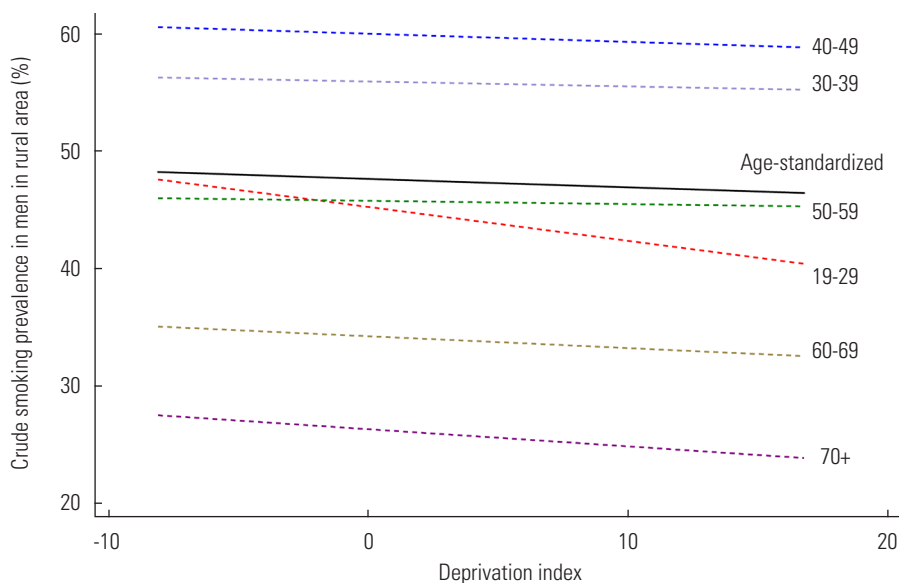

**Supplemental Figure 2.** Associations of area deprivation index and age-group specific smoking prevalences among men in rural areas. Source from Community Health Survey in Korea, 2008-2014.
