# Supplementary material for: Income Differences in Smoking Prevalences in 245 Districts of South Korea: Patterns by Area Deprivation and Urbanity, 2008-2014
Source: PubMed Central journal article supplement — J Prev Med Public Health. 2017 Feb 9;50(2):100–26. doi: 10.3961/jpmph.16.069 (PMC5398336; doi:10.3961/jpmph.16.069), 2017-02-09
Supplement: jpmph-50-2-100-suppl6.pdf [file jpmph-50-2-100-suppl6.pdf]

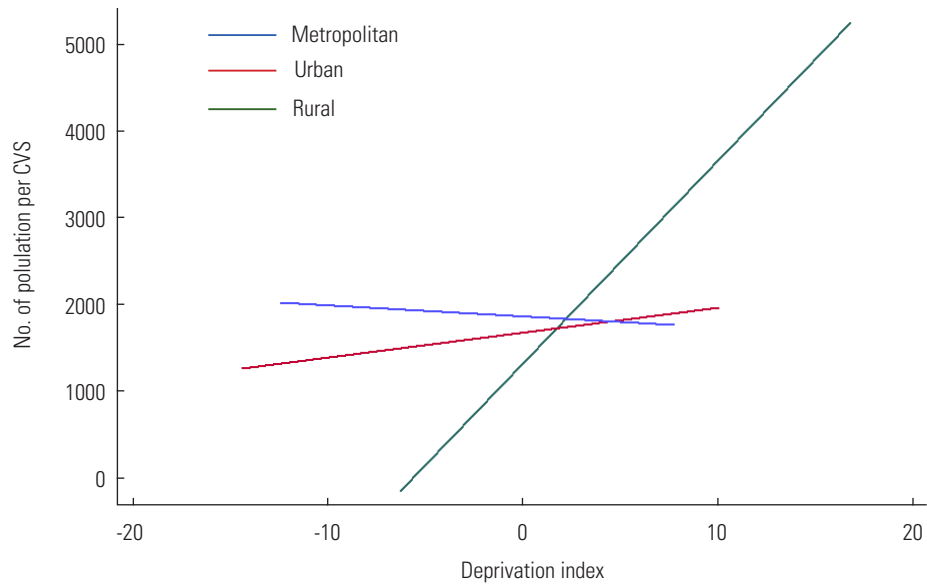

**Supplemental Figure 3.** Associations of the area deprivation index with the number of population per each convenience store. Source from Korea Association of Convenience Store Industry and Statistics Korea, 2012. CVS, convenience store.
